# A critical re-evaluation of fMRI signatures of motor sequence learning

Eva Berlot<sup>1</sup>, Nicola J. Popp<sup>1</sup>, & Jörn Diedrichsen<sup>1-3</sup>

<sup>1</sup> The Brain and Mind Institute, University of Western Ontario, Canada

<sup>2</sup> Department of Statistical and Actuarial Sciences, University of Western Ontario, Canada

<sup>3</sup> Department of Computer Science, University of Western Ontario, Canada

## Correspondence

Jörn Diedrichsen, The Brain and Mind Institute, University of Western Ontario, London, Canada. [jdiedric@uwo.ca](mailto:jdiedric@uwo.ca)

29

## Abstract

30

31 Despite numerous studies, there is little agreement about what brain changes accompany motor  
32 sequence learning, partly because of a general publication bias that favors novel results. We  
33 therefore decided to systematically reinvestigate proposed functional magnetic resonance  
34 imaging correlates of motor learning in a preregistered longitudinal study with four scanning  
35 sessions over 5 weeks of training. Activation decreased more for trained than untrained  
36 sequences in premotor and parietal areas, without any evidence of learning-related activation  
37 increases. Premotor and parietal regions also exhibited changes in the fine-grained, sequence-  
38 specific activation patterns early in learning, which stabilized later. No changes were observed in  
39 the primary motor cortex (M1). Overall, our study provides evidence that human motor sequence  
40 learning occurs outside of M1. Furthermore, it shows that we cannot expect to find activity  
41 increases as an indicator for learning, making subtle changes in activity patterns across weeks  
42 the most promising fMRI correlate of training-induced plasticity.

43  
44  
45  
46  
47  
48  
49  
50  
51  
52  
53  
54  
55  
56  
57  
58  
59  
60  
61  
62  
63  
64  
65  
66  
67  
68  
69  
70  
71  
72  
73  
74  
75  
76

## Introduction

Humans have the remarkable ability to learn complex sequences of movements. While behavioural improvements in sequence learning tasks are easily observable, the underlying neural processes remain elusive. Understanding the neural underpinnings of motor sequence learning could provide clues about more general mechanisms of plasticity in the brain. This motivation has led numerous functional magnetic resonance imaging (fMRI) studies to investigate the brain changes related to motor sequence learning. However, there is little agreement about how and where in the brain learning-related changes are observable. Previous studies include reports of signal increases across various brain regions (Floyer-Lea & Matthews, 2005; Grafton, Hazeltine, & Ivry, 1995; Hazeltine, Grafton, & Ivry, 1997; Karni et al., 1995; Lehericy et al., 2005; Penhune & Doyon, 2002), as well as signal decreases (Jenkins, Brooks, Nixon, Frackowiak, & Passingham, 1994; Peters, Lee, Hedrick, Neil, & Komiyama, 2017; Toni, Krams, Turner, & Passingham, 1998; Ungerleider, Doyon, & Karni, 2002; Wiestler & Diedrichsen, 2013), nonlinear changes in activation (Ma et al., 2010; Xiong et al., 2009), spatial shifts in activity (Lehericy et al., 2006; Steele & Penhune, 2010), changes in multivariate patterns (Wiestler & Diedrichsen, 2013; Wymbs & Grafton, 2015), and changes in inter-regional functional connectivity (Bassett, Yang, Wymbs, & Grafton, 2015; Bassett et al., 2010; Doyon et al., 2002; Mattar et al., 2016). Additionally, some experiments have matched the speed of performance (Karni et al., 1995; Penhune & Doyon, 2002; Steele & Penhune, 2010; Lehericy et al., 2005; Seidler et al., 2002, 2005), while others have not (Bassett et al., 2015; Lutz, Koeneke, Wüstenberg, & Jäncke, 2004; Wiestler & Diedrichsen, 2013; Wymbs & Grafton, 2015). Given that fMRI analysis has many degrees of freedom, these inconsistencies may not be too surprising. However, the implicit pressure in the publication system to report findings may also have contributed to a lack of coherency. To address this issue, we designed a comprehensive longitudinal study of motor sequence learning that allowed us to systematically reinvestigate previous findings. In order to increase transparency, we pre-registered the design, as well as all tested hypotheses on the Open Science Framework (Berlot, Popp, & Diedrichsen, 2017; <https://osf.io/etnqc>), and make the full dataset available to the research community.

The main aim of our study was to systematically evaluate different ideas of how learning-related changes are reflected in the fMRI signal. In the context of motor sequence learning, the most commonly examined brain region is the primary motor cortex (M1). Previous reports of increased M1 activation after long-term learning have been interpreted as additional recruitment of neuronal resources for trained behavior, taken to suggest the skill is represented in M1 (Floyer-

77 Lea & Matthews, 2005; Karni et al., 1995, 1998; Lehéricy et al., 2005; Penhune & Doyon, 2002;  
78 for a review see Dayan & Cohen, 2011; **Fig. 1a**). Since then, several pieces of evidence have  
79 suggested that sequence-specific memory may not reside in M1 (Beukema, Diedrichsen, &  
80 Verstynen, 2019; Wiestler & Diedrichsen, 2013; Yokoi & Diedrichsen, 2019). However, some of  
81 these reports studied skill acquisition over a course of a few days, while human skill typically  
82 evolves over weeks (and months) of practice. Therefore, including several weeks of practice,  
83 might be more suitable to test whether, and at what time point, M1 develops skill-specific  
84 representations.

85 Outside of M1, learning-related activation changes have been reported in premotor and  
86 parietal areas (Grafton, Hazeltine, & Ivry, 2002; Hardwick, Rottschy, Miall, & Eickhoff, 2013;  
87 Honda et al., 1998; Penhune & Doyon, 2002; Tamás Kincses et al., 2008; Vahdat et al., 2015),  
88 with activation increases commonly interpreted as increased involvement of these areas in the  
89 skilled behavior. Yet, recent studies have mostly found that, as the motor skill develops, activation  
90 in these areas predominantly decreases (Penhune & Steele, 2012; Wiestler & Diedrichsen, 2013;  
91 Wu et al., 2004). Such reductions are harder to interpret as they could reflect a reduced areal  
92 involvement in skilled performance or, alternatively, more energy efficient implementation of the  
93 same function (**Fig. 1b**) (Picard, Matsuzaka, & Strick, 2013; Poldrack et al., 2005). To complicate  
94 things further, regional activity increases and decreases could occur simultaneously in the same  
95 area (**Fig. 1c**; Steele & Penhune, 2010). In such a scenario, the net activation in the region would  
96 not change, yet, the trained sequences would engage slightly different subpopulations of the  
97 region than untrained sequences.

98 A variant of this idea is that each specific sequence becomes associated with dedicated  
99 neuronal subpopulation (and hence fMRI activity pattern). Such a representation would form the  
100 neural correlate of sequence-specific learning – the part of the skill that does not generalize to  
101 novel, untrained motor sequences (Karni et al., 1995). Sequence-specific activation patterns  
102 should change early in learning (**Fig. 1d**), when behavior improves most rapidly, and stabilize  
103 later, once the skill has consolidated and an optimal pattern is established (Peters et al., 2017).  
104 One possible way in which sequence-specific patterns could reorganize is by becoming more  
105 distinct from one another (**Fig. 1e**; Wiestler & Diedrichsen, 2013). Having a distinctive code for  
106 each sequence might be of particular importance to the system in a trained state, allowing it to  
107 produce different dynamical sequences, while avoiding confusion or “tangling” of the different  
108 neural trajectories (Russo et al., 2018).

109 To systematically examine the cortical changes associated with motor sequence learning,  
110 we carried out a longitudinal study over 5 weeks of training with 4 sessions of high-field (7 Tesla)

111 fMRI scans. Behavioural performance in the first three scanning sessions was imposed to the  
112 same speed of performance. This allowed us to inspect whether examined fMRI metrics reflect  
113 brain reorganization, independent of behavioral change. However, controlling for speed incurs  
114 the danger of not tapping into neural resources that are necessary for skilled performance (Orban  
115 et al., 2010; Poldrack, 2000). We therefore compared the fMRI session with paced performance  
116 at the end of behavioural training with one acquired with full speed performance (**Fig. 2**). This  
117 manipulation allowed us to systematically assess the role of speed on the fMRI metrics of learning,  
118 thereby addressing an important methodological problem faced by virtually every study on motor  
119 learning.  
120

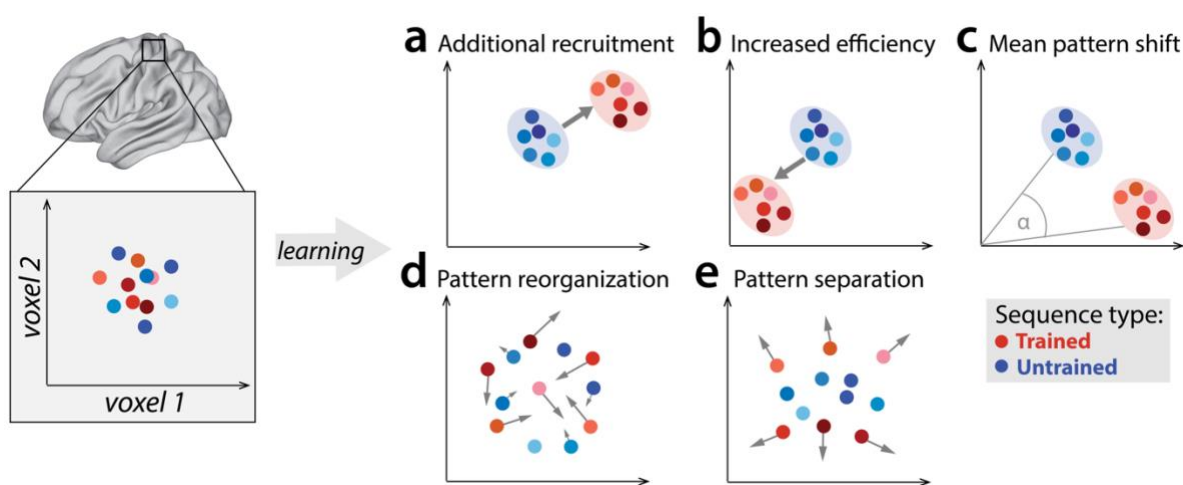

121  
122 **Figure 1. Potential fMRI signatures of learning in a specific brain area.** Each panel shows hypothetical  
123 activation for the six trained sequences (red) and the six untrained sequences (blue) in the space of two  
124 hypothetical voxels. **a)** Activation could increase during learning across voxels, indicating additional  
125 recruitment of resources involved in skilled behavior. **b)** Activation could decrease across voxels, implying  
126 that the region performs its function more efficiently. **c)** Some voxels (x-axis) could increase activation with  
127 training, while others (y-axis) could decrease. This would lead to a shift of the overall activity pattern in the  
128 region without an overall net change in activation. **d)** Activation patterns specific to each trained sequence  
129 could undergo more change than untrained sequences, reflective of plastic reorganization of the sequence  
130 representation. Arrow length in the figure indicates the amount of reorganization. **e)** One specific form of  
131 such reorganization would be increasing dissimilarities (pattern separation) between activity patterns for  
132 individual trained sequences.

133

## Results

134

### 135 ***Speed of sequence execution increases with learning***

136 We trained 26 participants to perform six 9-digit sequences with their right hand on a keyboard  
137 device (**Fig. 2a**). During training, they received visual feedback (green for correct and red for  
138 incorrect presses) and were rewarded for both accuracy and speed (see Materials and Methods).  
139 Over the course of 5 weeks, participants practiced ~4000 trials (**Fig. 2b**). This led to substantial  
140 performance improvement, with the average movement time (MT) to complete a sequence  
141 decreasing from an initial 3.2 seconds to 1.2 seconds at the end of the training (**Fig. 2c**). The  
142 training regime was complemented with behavioral assessments on four occasions designed to  
143 specifically assess participants' performance on trained sequences relative to untrained  
144 sequences (**Fig. 2d**, yellow underlay). Prior to training (test day 1), the speed of sequence  
145 execution did not differ between trained and untrained sequences. For all subsequent sessions,  
146 MTs were significantly faster for trained than untrained sequences ( $p < .001$ ), implying sequence-  
147 specific learning. Additionally, performance of trained sequences improved between all  
148 subsequent sessions, even after week 3 (week 3-5:  $t_{(25)}=5.49$ ,  $p=1.1e-5$ ). Thus, participants'  
149 performance of trained sequences improved across the five weeks.

150 To assess fMRI changes with learning, participants underwent four fMRI scans (1<sup>st</sup> scan:  
151 before the main training; 2<sup>nd</sup> scan: week 2; 3<sup>rd</sup> & 4<sup>th</sup> scan: week 5), performing both trained and  
152 untrained sequences (**Fig. 2d** – grey underlay). During the first three sessions, participants were  
153 paced with a metronome so that all sequences, trained and untrained, were performed at the  
154 same speed as in the first scan. Performance in the fourth session was at maximum speed,  
155 resulting in significantly lower MTs for trained compared to untrained sequences (**Fig. 2d**). To  
156 assess different neural signatures of observed behavioral learning, we first examined how the  
157 overall evoked activation changed over weeks of training for the same speed of movement.

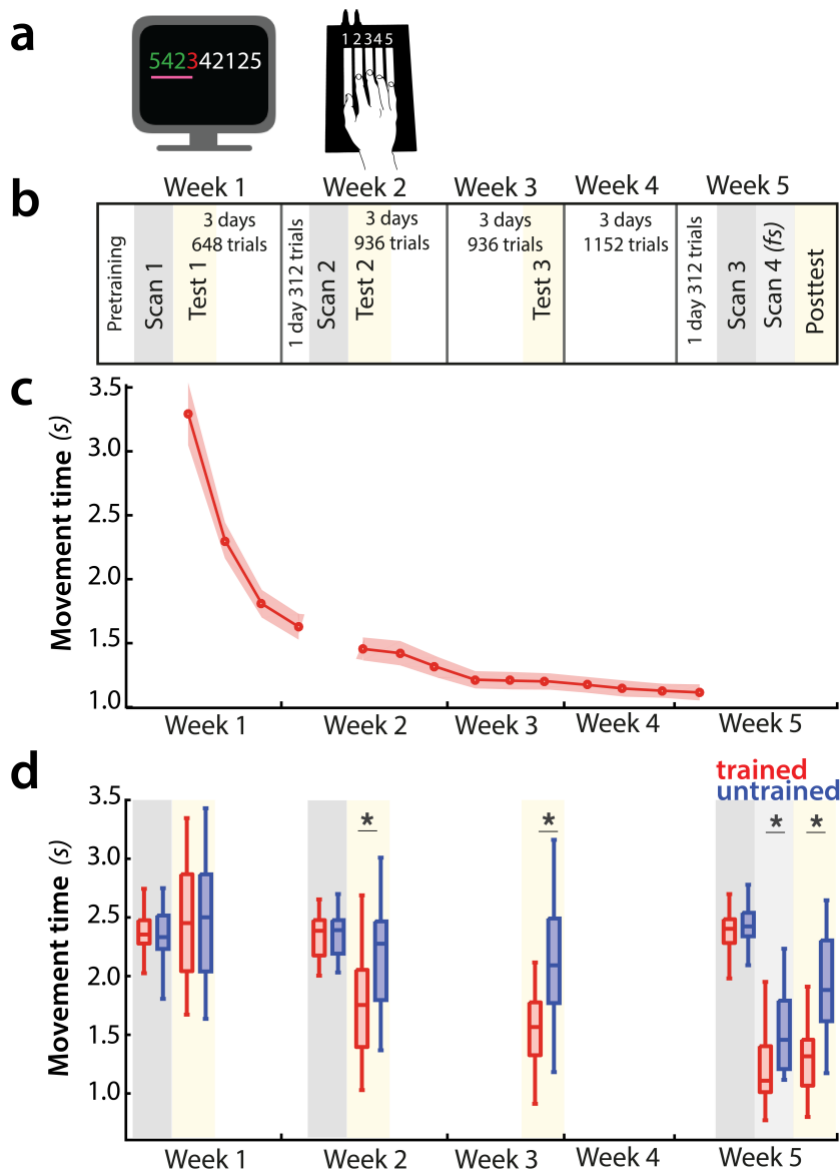

158  
 159 **Figure 2. Experimental design and paradigm.** **a)** Apparatus and task. Participants were trained to  
 160 perform six 9-item sequences on a keyboard device. For each finger press, the corresponding digit on the  
 161 screen turned green (correct) or red (incorrect). During fMRI scans 1-3, an expanding pink line under the  
 162 numbers indicated the pace at which participants had to press the keys. See supplementary figure **S2** for  
 163 trial structure during scanning sessions. **b)** Training protocol lasted for 5 weeks, and included four  
 164 behavioral test sessions (yellow underlay) and four scans (grey underlay). Scans 1-3 were performed at a  
 165 paced speed, while scan 4 performance was full speed (*fs*). **c)** Average group performance executing  
 166 trained sequences across the training sessions, measured in seconds. The average movement time (MT)  
 167 decreased with learning. Shaded area denotes between-subject standard error. **d)** Performance during  
 168 scanning sessions and behavioral tests, measured in seconds. Performance of trained sequences  
 169 improved across all subsequent behavioral test sessions. Performance improved also for untrained  
 170 sequences from week 2 onwards, suggesting some transfer in learning, but performance was still faster for  
 171 trained sequences, indicating sequence-specific learning. Error bars indicate between-subject standard  
 172 error. Stars denote significance levels lower than  $p < .001$ .

173 **Overall activation does not change in M1**

174 First, we re-investigated the classical finding that activity, measured as the percent BOLD signal  
175 change relative to rest, increased in M1 for matched performance after long-term training (Karni  
176 et al., 1995; **Fig. 1a**). Our task elicited activation in a range of cortical areas (**Fig. 3a** for session  
177 1 – i.e., prior to learning). A region of interest (ROI) analysis of the hand area of M1, contralateral  
178 to the performing hand, however, showed no significant change across weeks (**Fig. 3b**,  
179  $F_{(2,50)}=1.82$ ,  $p=.17$ ). Neither did we find any difference between trained and untrained sequences  
180 ( $F_{(1,25)}=0.19$ ,  $p=.66$ ), or a significant interaction between the two ( $F_{(2,50)}=2.01$ ,  $p=0.14$ ).

181 The absence of overall activity changes, however, should not be taken as evidence for an  
182 absence of plasticity in the region. It is possible that some subregions of M1 increased in activation  
183 for learned sequences, while other decreased, as suggested by Steele and Penhune (2010). Such  
184 mixed changes would result in a shift of the overall pattern, which would lead to an increase in  
185 the angle between the mean activity pattern for trained and untrained sequences (**Fig. 1c**).  
186 Because we calculated the angle between activity patterns for each participant separately, this  
187 criterion does not assume that the observed shift is spatially consistent across individuals – any  
188 idiosyncratic shift could be detected. Therefore it serves as a sensitive statistical criterion to detect  
189 shifts in spatial location of activation, which were previously reported only descriptively (Steele &  
190 Penhune, 2010).

191 However, in M1, the averaged cosine angle (**Fig. 3c**) remained unchanged across the  
192 weeks ( $F_{(2,50)}=1.71$ ,  $p=.19$ ), indicating that the average activity pattern remained comparable  
193 across trained and untrained sequences. In sum, we found no evidence for activation increases  
194 (Karni et al., 1995), decreases, or relative shifts in activation patterns (Steele & Penhune, 2010)  
195 in M1.



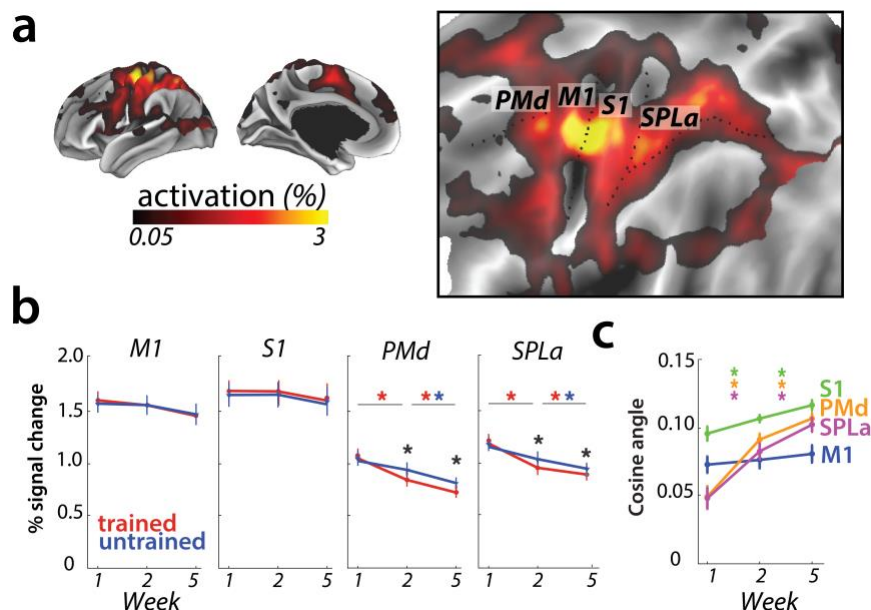

196  
197  
198 **Figure 3. Overall activation and changes with learning in defined regions of interest. a)** Average  
199 activation during production of any sequence in scanning session 1 (prior to learning) in the hemisphere  
200 contralateral to the performing hand. Activation was contrasted against resting baseline. On the right,  
201 activation map is presented on a flattened surface, corresponding to surface maps in other figures. **b)**  
202 Changes in activation across predefined areas – primary motor cortex (M1), primary somatosensory cortex  
203 (S1), premotor dorsal area (PMd) and superior parietal lobule – anterior (SPLa). No significant changes in  
204 activation were observed in M1 or S1 across weeks or between trained and untrained sequences (\*  
205 indicates  $p < .01$ ). Error bars indicate between-subject standard error. **c)** The cosine angle  
206 dissimilarity between average trained and untrained sequence across scanning weeks. The cosine angle  
207 increased significantly across weeks in PMd, SPLa and S1, but not M1 (\* indicates  $p < .05$ ). Error bars indicate  
208 between-subject standard error.

### 209 ***Learning-related activation changes in premotor and parietal areas***

210 To investigate activation changes in areas outside of M1, we calculated changes in activity  
211 between the weeks in a map-wise approach (**Fig. 4a**). Over the three measurement time points,  
212 we found no reliable activation increases in any cortical area that was activated by the task in  
213 week 1. Instead, we observed widespread learning-related reductions in activity in premotor and  
214 parietal areas (**Fig. 4a**), in line with our pre-registered prediction. These activation reductions  
215 were observed across both subsequent sessions (i.e. weeks 1-2, weeks 2-5) for trained and  
216 untrained sequences, with bigger reductions for trained sequences. In weeks 2 and 5, trained  
217 sequences elicited overall lower activity than untrained sequences (**Fig. 4b**; see supplementary  
218 figure **S4** for statistical maps). These learning-related reductions in activity were also statistically  
219 significant in our predefined ROIs in premotor (dorsal premotor cortex – PMd) and parietal cortices  
220 (anterior superior parietal lobule – SPLa) (**Fig. 3b**): In a 3 (week) x 2 (sequence type) ANOVA on  
221 observed activation both main effects and interaction were highly significant in PMd (week:

222  $F_{(2,50)}=17.47$ ,  $p=1.77e-6$ ; sequence type:  $F_{(1,25)}=11.86$ ,  $p=2.03e-3$ ; interaction:  $F_{(2,50)}=13.22$ ,  
223  $p=2.46e-5$ ) as well as in SPLa (week:  $F_{(2,50)}=19.14$ ,  $p=6.73e-7$ ; sequence type:  $F_{(1,25)}=19.36$ ,  
224  $p=1.77e-4$ ; interaction:  $F_{(2,50)}=21.59$ ,  $p=1.74e-7$ ). In contrast, no main effect of week was observed  
225 in S1 ( $F_{(2,50)}=0.44$ ,  $p=.85$ ). There was a significant main effect of sequence type ( $F_{(1,25)}=6.32$ ,  
226  $p=.019$ ), but none of the post-hoc t-tests revealed a significant difference. The week x sequence  
227 type interaction was not significant in S1 ( $F_{(2,50)}=0.17$ ,  $p=.84$ ). Thus, we observed widespread  
228 activation decreases with learning across secondary and association cortical areas.

229 In a few smaller areas, activation increased with learning (red patches in **Fig. 4a-b**). This  
230 was observed uniformly in areas with activity at or below baseline – thus these changes reflect  
231 decreased suppression of activity rather than increases. It is likely that these activity increases  
232 are not task relevant, but instead reflect the increasing automaticity and lower need for central  
233 attentional resources with learning (see Discussion).

**a** Activation change across weeks (average sequence)

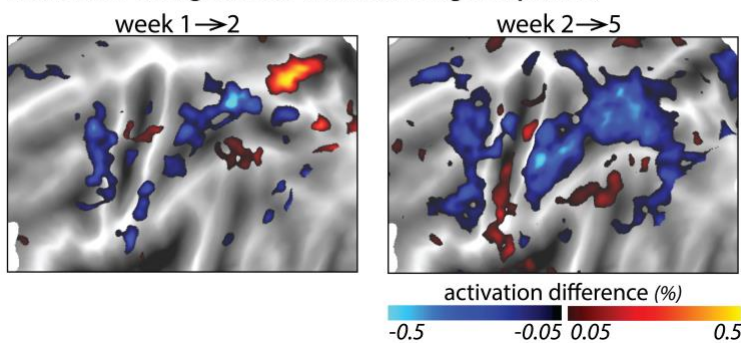

**b** Trained vs. untrained activation

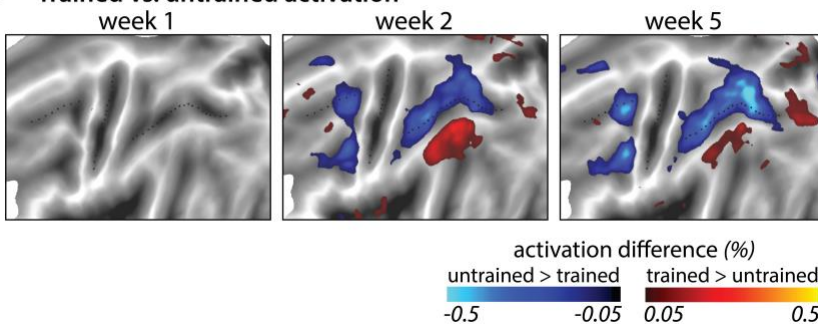

234 **Figure 4. Changes in average activation across the cortical surface. a)** Average change in activation  
235 across subsequent sessions. Activation was measured as difference in percent signal change relative to  
236 the resting baseline. Activation decreased (blue shades) in motor-related regions across sessions during  
237 sequence execution. **b)** Contrast of activation for trained vs. untrained sequences per scanning session. In  
238 weeks 2 and 5, trained sequences elicited lower activation in motor-related regions than untrained  
239 sequences (blue shades; see supplementary figure **S4** for *t*-maps and statistical quantification of activation  
240 clusters). Areas with observed increases in activation for trained sequences (red shades) lie in the default  
241 mode network that showed on average lower activity during task than rest.  
242  
243

244 We also examined whether there were, in addition to the overall activity decreases, shifts  
245 in the average activity patterns in the predefined regions of interest (**Fig. 1c**). As for M1, we  
246 calculated the cosine angle dissimilarity (see Materials and Methods) between the average  
247 activity patterns for trained and untrained sequences, separately for each scanning session.  
248 Figure **5a** shows cosine angle dissimilarities between trained and untrained sequences in PMd,  
249 displayed using multidimensional scaling (MDS). Patterns for trained sequences moved away  
250 from the starting point over weeks, and became more different from untrained patterns. Both in  
251 parietal and premotor areas there was clear evidence for a shift – cosine angular dissimilarity  
252 between the average trained and untrained sequence activation increased significantly across  
253 weeks (PMd:  $F_{(2,50)}=23.63$ ,  $p=5.98e-8$ ; SPLa:  $F_{(2,50)}=23.19$ ,  $p=7.49e-8$ ) (**Fig. 3c**). S1 also showed a  
254 significant increase in cosine dissimilarity between trained and untrained patterns with learning  
255 ( $F_{(2,50)}=8.68$ ,  $p=5.79e-4$ ). These changes, however, were much less pronounced than those  
256 observed in premotor and parietal areas.

257 To investigate whether the observed changes in the overall activity patterns in premotor  
258 and parietal areas were spatially consistent across individuals, we normalized (z-scored)  
259 activation maps in each region and assessed the relative contribution of subregions to overall  
260 activation in weeks 1 and 5 (**Fig. 5b**). Comparing the pattern of activation revealed that before  
261 training (week 1, blue) sequences elicit relatively more activation in rostral parts of the premotor  
262 and supplementary motor areas, and that activity was more caudal after training (week 5, red;  
263 **Fig. 5c** displays the cross-section of relative activation changes). Some differences were also  
264 observed in the posterior parietal cortex, with activation shifting from more posterior to anterior  
265 subregions after learning (**Fig. 5c**). Altogether, these results show that with learning, the execution  
266 of sequences relies on slightly different subareas within premotor and parietal regions.

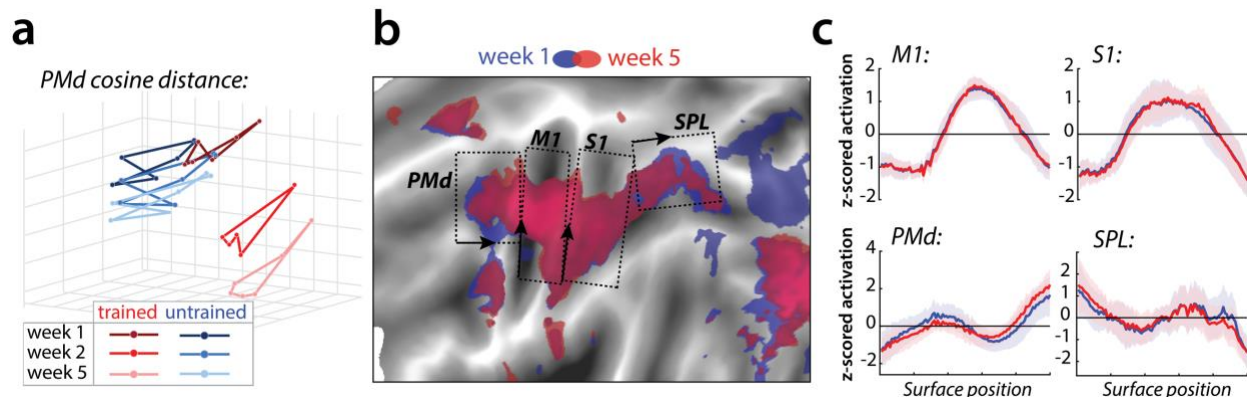

267 **Figure 5. Relative change in evoked activation.** a) Multidimensional scaling plot of cosine angle  
268 dissimilarities for trained and untrained sequences in premotor dorsal area (PMd) across weeks 1-5. Each  
269 dot represents a single sequence, and dots are connected for each session and sequence type separately.  
270 Trained sequences on average become more distant from untrained sequences with learning. Untrained  
271

272 sequences on average also progress across weeks, but less than trained sequences. **b)** Normalized  
273 activation plots for trained sequences in week 1 (blue) and 5 (red). The arrows and brackets indicate the  
274 direction and range of activation cross-sections presented in c). Areas: dorsal premotor cortex (PMd),  
275 primary motor cortex (M1), primary somatosensory cortex (S1), superior parietal lobule (SPL). **c)** Cross-  
276 section of elicited activation for trained sequences in defined areas, in weeks 1 (blue) and 5 (red).  
277

### 278 ***Sequence-specific activity patterns reorganize early in learning***

279 Our analyses so far have been concerned with changes in the overall pattern of trained vs.  
280 untrained sequences, and showed widespread reductions in activation and some more subtle  
281 changes in relative location. The sequence-specific performance advantage, however, indicates  
282 that the brain must represent specific sequences – i.e. there should be activity patterns that are  
283 unique to each individual sequence. Sequence-specific learning should then be reflected in  
284 changes of these sequence-specific activity patterns with learning (**Fig. 1d**). Consistent with  
285 previous results (Wiestler & Diedrichsen, 2013; Yokoi & Diedrichsen, 2019), we detected  
286 sequence-specific activity patterns, i.e. activity patterns that differentiate between the tested  
287 motor sequences, in various cortical regions, even in session 1 (**Fig. 6a**). This allowed us to  
288 assess their reorganization across sessions.

289 Our pre-registered hypothesis (<https://osf.io/etnqc>) was that earlier in learning sequence-  
290 specific activity patterns would change more for trained than untrained sequences, and would  
291 stabilize later in learning. In contrast to the other ideas tested in this paper, this was a novel  
292 hypothesis and not based on previous reports. Specifically, we predicted that the correlation of  
293 each sequence-specific pattern between weeks 1 and 2 should be lower for trained as compared  
294 to untrained sequences. The problem with performing a simple correlation analysis on the  
295 patterns, however, is that the estimated correlation will be biased by noise – i.e., more within-  
296 session variability for one set of sequences will result in a lower correlation (Diedrichsen, Yokoi,  
297 & Arbuckle, 2017). To address this problem, we used the pattern component modelling (PCM)  
298 framework which explicitly models and estimates the signal and noise for each session explicitly.  
299 Using this approach, we estimated the likelihood of each participants' data under a series of  
300 models, each assuming a true correlation in the range between 0 (uncorrelated patterns) and 1  
301 (perfect positive correlation; see Materials and Methods for details). Figure **6b** shows the log-  
302 likelihood for each specific correlation model relative to the mean across all models. In SPLa, the  
303 most likely correlation of the activity patterns for the trained sequences between weeks 1 and 2  
304 was  $r=0.37$ . For week 2-5, the likelihood peaked at  $r=0.6$ . In contrast, the likelihood functions for  
305 untrained sequences indicated that the most likely model was between  $r=0.6-0.7$  for both week  
306 1-2 and 2-5. The advantage of this analysis is that we can be sure that the observed low  
307 correlation in week 1-2 for trained sequence was not due to increased noise. In fact, if the noise

308 in one or both sessions was too high, then the model would be unable to distinguish between any  
309 of the correlation models – i.e. the likelihood curve would be a flat line.

310 To statistically assess the difference in correlations across trained and untrained  
311 sequences, we compared the likelihood of the data of trained sequences between two models:  
312 the best-fitting model for the trained sequences ( $r=0.37$  in SPLa) and the correlation model best  
313 fitting the data of untrained sequences ( $r=0.6$ ) (black dots and projections onto y-axis in **Fig. 6b**).  
314 To avoid double-dipping, the ‘best-fitting’ model was chosen on 25 participants ( $n-1$ ) and the  
315 likelihood assessed on the left-out subject (see Materials and Methods). The difference in model  
316 evidence was significant for correlation between weeks 1-2 in SPLa ( $t_{(25)}=2.88$ ,  $p=8.0e-3$ ). In  
317 contrast, no difference in correlation was observed later in learning, between weeks 2 and 5  
318 ( $t_{(25)}=1.21$ ,  $p=0.24$ ). A similar pattern of results was observed in PMd, with correlation of trained  
319 sequences significantly lower than that of untrained sequences between weeks 1 and 2 ( $t_{(25)}=2.93$ ,  
320  $p=7.2e-3$ ), but not between weeks 2 and 5 ( $t_{(25)}=0.88$ ,  $p=.39$ ). No such change in correlation across  
321 weeks 1-2 was observed in M1 ( $t_{(25)}=0.43$ ,  $p=.67$ ) or S1 ( $t_{(25)}=1.72$ ,  $p=0.097$ ). Overall, we found  
322 significant evidence that sequence-specific trained patterns in SPLa and PMd reorganize more in  
323 weeks 1-2 as compared to the untrained sequences, and stabilize later on with learning, in line  
324 with our new pre-registered prediction.

325 To determine more generally where in the neocortex sequence-specific plasticity could be  
326 detected, we fit PCM correlation models to regularly tessellated regions spanning the cortical  
327 surface. Figure **6c** displays the correlation with the highest evidence for activity patterns across  
328 weeks 1-2 and 2-5; separately for trained and untrained sequences. In general, the highest  
329 correlations were found in core sensory-motor areas. Across weeks 1-2 for trained sequences,  
330 correlations were significantly lower in a number of dorsal premotor, inferior frontal, and parietal  
331 regions (**Fig. 6c**). Across the cortex, correlation for trained patterns increased for weeks 2-5,  
332 resulting in similar values which did not differ significantly between trained and untrained  
333 sequences for most tessels (see supplementary figure **S6**). Together, these results confirmed that  
334 sequence-specific activation patterns in secondary association areas show less stability early in  
335 learning, but stabilize later on.

336 Can we obtain further insight into *how* the sequence-specific patterns change in these  
337 areas? One specific preregistered prediction was that there would be an increase in  
338 distinctiveness (dissimilarity) between fMRI patterns underlying each trained sequence (Wiestler  
339 & Diedrichsen, 2013; **Fig. 1e**). To test this hypothesis, we calculated crossnobis dissimilarities  
340 (Walther et al., 2016) between sequence-specific activations, separately for trained and untrained  
341 sequences. In contrast to our prediction, no significant change in dissimilarity across weeks was

342 observed in any of the predefined regions (**Fig. 6d**). This suggests that the reorganization  
 343 observed for trained sequences early in learning did not increase the average distinctiveness of  
 344 the sequence-specific patterns.

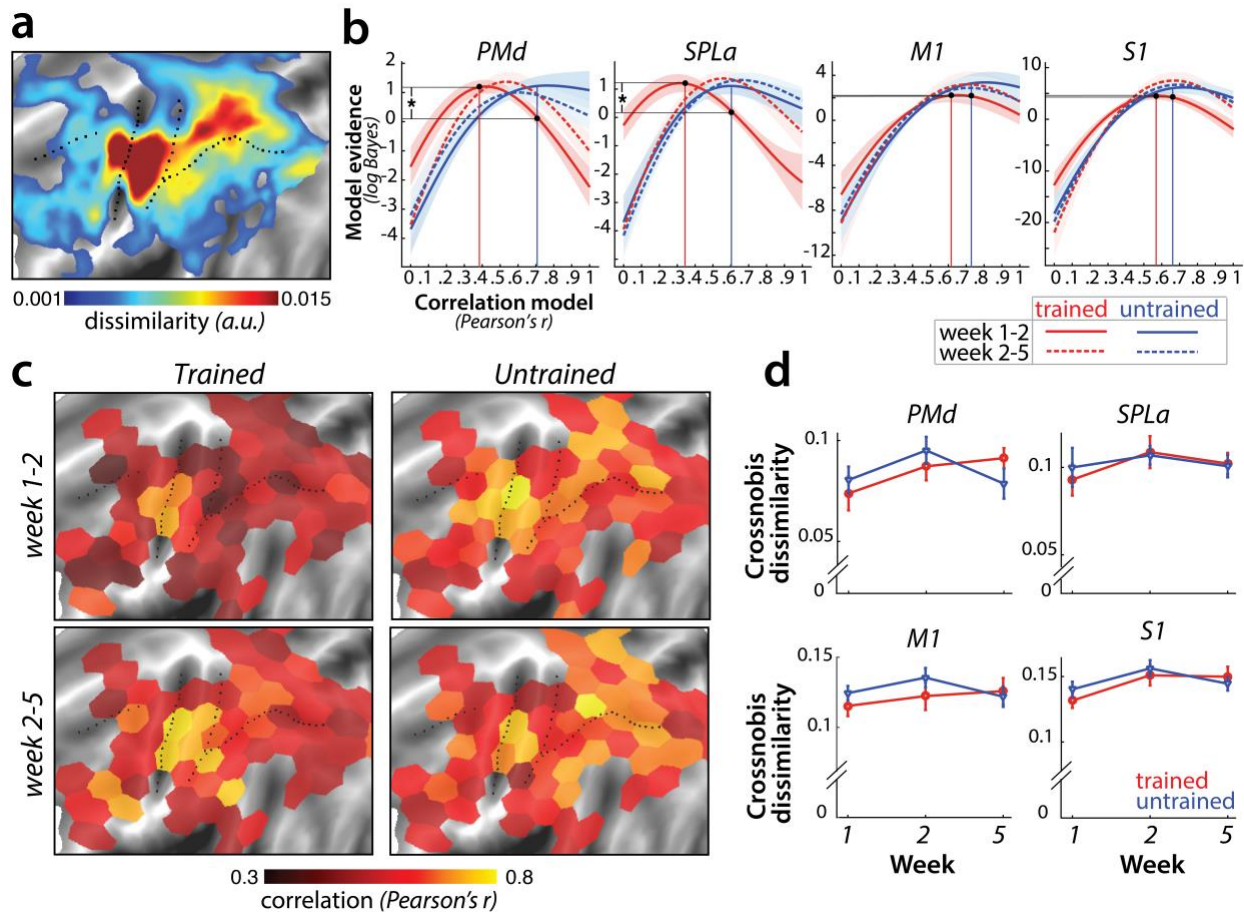

345 **Figure 6. Sequence-specific activity patterns reorganize across sessions.** **a**) Cortical surface map of  
 346 crossnobis dissimilarities between activity patterns for different sequences in session 1. These regions  
 347 encode which sequence is executed by the participant. **b**) Evidence explained by models of correlation  
 348 values between  $r=0$  and  $r=1$  for sequence-specific patterns across weeks 1-2 (solid) and 2-5 (dashed),  
 349 separately for trained (red) and untrained (blue) sequences. Evidence was assessed with a type-II log-  
 350 likelihood, relative to the average log-likelihood across models. Shaded areas indicate standard error  
 351 across participants. Difference between log-likelihoods can be interpreted as log-Bayes factor, with a  
 352 difference of 1 indicating positive evidence. Horizontal lines are drawn for the winning correlation model for  
 353 trained (red) and untrained (blue) patterns across weeks 1-2. Black dots are projections of the two winning  
 354 models onto the correlation function of trained sequences across weeks 1-2. The horizontal lines from the  
 355 two black dots indicate the likelihood of the trained data under the two models, which was tested in a  
 356 crossvalidated t-test. **c**) Map displaying the correlation of the winning model for trained and untrained  
 357 sequences across weeks 1-2 and 2-5. The correlation of the winning correlation model is shown in all  
 358 tessels where the difference between evidence for winning model vs. worst-fitting model exceeds log-Bayes  
 359 factor of 1 (averaged across participants). See **S6** for the difference in best model correlation between  
 360 trained and untrained sequences, and an indication of tessels where the difference is significant, as based  
 361 on the crossvalidated t-test. **d**) Crossnobis dissimilarities between trained and untrained sequence pairs  
 362

363 across weeks. No significant effect of week, sequence type or their interaction was observed in any of the  
364 regions. Error bars indicate standard error across participants.

365

### 366 ***Trained sequences elicit distinct patterns during full speed performance***

367 In the last part of the experiment, we asked whether some of the negative findings (e.g. no  
368 changes in M1, no increase in dissimilarities for trained sequences) might have been due to the  
369 fact that participants were paced at a relatively slow speed. Matching the speed across sessions  
370 allows for the comparisons of changes in neural activity for exactly the same behavioral output  
371 (Karni et al., 1995; Lehericy et al., 2005). However, it could be that controlling for speed impairs  
372 our ability to study brain representations of motor skill; simply because after learning, the system  
373 is not challenged enough to activate the neuronal representations supporting skilled performance.  
374 Consequently, several studies have not (Bassett et al., 2010; Wymbs & Grafton, 2015), or not  
375 strictly (Wiestler & Diedrichsen, 2013), matched performance across sessions or levels of training.  
376 To examine the effect of performance speed, we added a fourth scanning session (*fs*), just a day  
377 after from the third session in week 5, in which participants were instructed to perform the  
378 sequence as fast as possible.

379 Performance during the 4<sup>th</sup> scan was 1010 ms faster than in the first session ( $t_{(25)}=15.7$ ,  
380  $p=1.82e-14$ ) and also 338 ms ( $t_{(25)}=9.92$ ,  $p=4.58e-10$ ) faster for trained than for untrained  
381 sequences. Averaged over trained and untrained sequences, we found that the faster  
382 performance in this session led to an increase in activity across premotor and parietal areas (**Fig.**  
383 **7a,b**). Although trained sequences were executed faster than untrained sequences, activation  
384 was still lower for trained compared to untrained sequences, similar to what we observed for  
385 paced performance (**Fig. 7c**; see **S7a** for statistical maps). In M1 and S1, we found no difference  
386 in activation between trained and untrained sequences (**Fig. 7a**; M1:  $t_{(25)}=1.78$ ,  $p=.09$ ; S1:  
387  $t_{(25)}=1.69$ ,  $p=.10$ ). Overall, the pattern of results for evoked activation did not change qualitatively  
388 when participants performed at full speed.

389 Next, we examined whether the brain representations of individual sequences are similarly  
390 engaged at slow and fast speeds. The correlation between sequence-specific patterns was  
391 relatively high ( $r=0.62$ ) across our regions of interest. We found no differences between the  
392 different regions ( $F_{(3,75)}=1.47$ ,  $p=.23$ ), or sequence types (trained vs. untrained:  $F_{(1,25)}=0.25$ ,  
393  $p=.62$ ). Thus, the sequence-specific representations activated during performance at high skill  
394 level (full speed) are at least partly activated even when performance slowed down.

395 Having established that the mean activation results are replicated across paced and full-  
396 speed performance, and that similar sequence-specific representations are activated in both  
397 cases, we tested whether activation patterns for different trained sequences are more distinct

398 during full speed performance, as reported in Wiestler & Diedrichsen (2013). Overall, crossnobis  
 399 dissimilarities increased at full speed for trained sequences in PMd and SPLa (**Fig. 7e**). No such  
 400 changes were found in M1 or S1. Moreover, trained sequences showed larger dissimilarities than  
 401 untrained at full-speed performance across premotor and parietal cortices (**Fig. 7f**), which was  
 402 not the case for the last paced session. In our predefined ROIs, this difference was significant for  
 403 PMd (**Fig. 7d**), but also parietal areas showed significantly higher dissimilarities between trained  
 404 sequences at full speed (supplementary figure **S7b**). This suggests that while activity patterns at  
 405 full speed are correlated to those during paced performance, they are more distinguishable for  
 406 trained sequences.

407 Could this effect be driven by behavioral performance, with trained sequences performed  
 408 more differently at full speed (i.e. different speeds across trained sequences), while untrained  
 409 sequences were performed at a more equal speed? To test for this, we calculated crossnobis  
 410 dissimilarities between movement times associated with different trained and untrained  
 411 sequences. The dissimilarities based on speed of performance did not differ significantly across  
 412 trained and untrained sequences ( $t_{(25)}=0.57, p=.57$ ). Therefore, increased dissimilarity of trained  
 413 compared to untrained patterns in premotor and parietal areas could not be explained by a  
 414 difference in execution speed. Instead, this effect likely reflects changes in activity patterns  
 415 underlying full speed skilled performance.

416

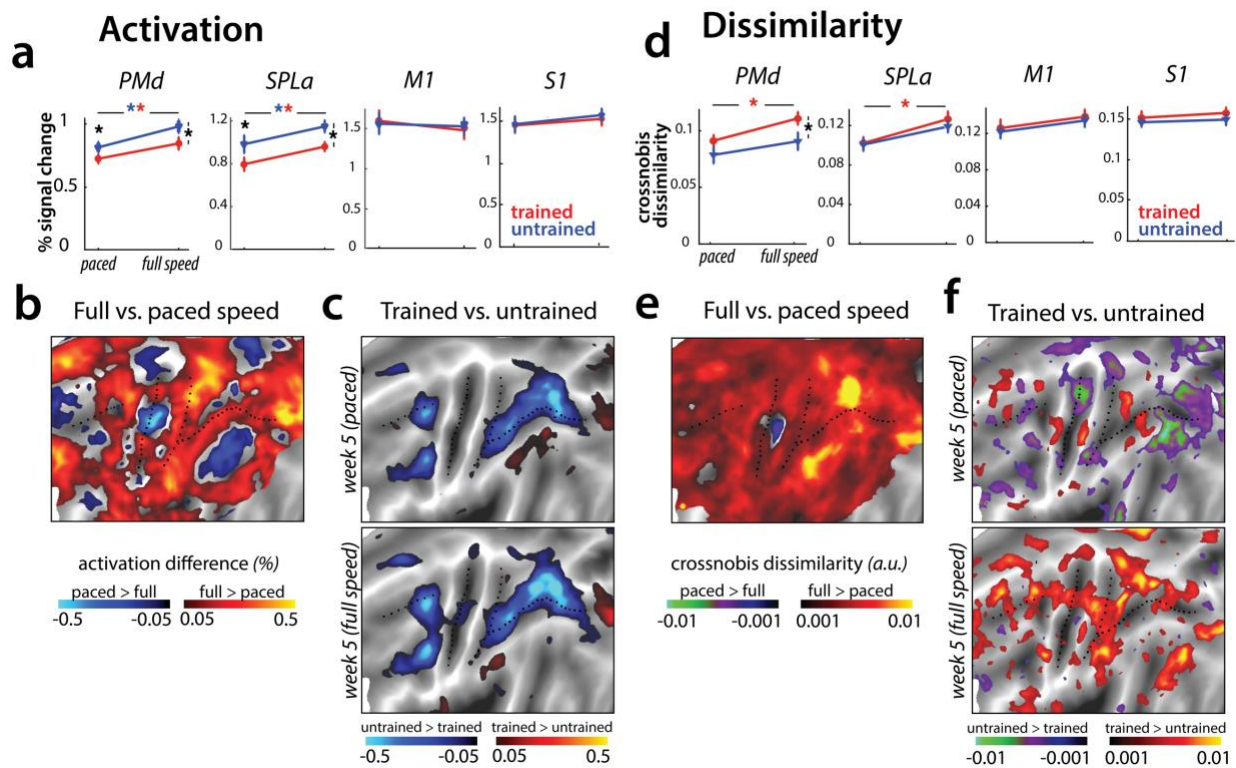

417



418 **Figure 7. Speed-related changes in activation and dissimilarities.** **a)** Overall activation in week 5 in  
419 paced and full speed sessions for trained (red) and untrained (blue) sequences. Activation was measured  
420 as percent signal change over resting baseline (\* indicates  $p < .05$ ). Error bars indicate standard error across  
421 participants. **b)** Increase in activation for full speed compared to paced speed in percent signal change,  
422 averaged across trained and untrained sequences. Red colors indicate an increase in activity during full  
423 speed performance compared to paced performance. Blue colors indicate higher activation during paced  
424 compared to full speed performance. **c)** Difference in activation elicited for trained relative to untrained  
425 sequences, during the paced and full speed sessions (see supplementary figure **S7a** for statistical maps).  
426 Trained>untrained is shown in red, untrained>trained in blue. **d)** Average crossnobis dissimilarity between  
427 sequence-specific patterns in paced and full speed sessions for trained and untrained sequences.  
428 Dissimilarities are significantly larger for trained (red), as compared to untrained (blue) patterns, in PMd for  
429 full-speed session (\* indicates  $p < .05$ ). Error bars indicate standard error across participants. **e)** Difference  
430 between crossnobis dissimilarities across full speed and paced sessions, averaged across trained and  
431 untrained sequences. Higher dissimilarities for full speed than paced session are shown in red, whereas  
432 blue/green hues indicate higher dissimilarities during paced than full speed session. **f)** Difference in  
433 dissimilarities for trained relative to untrained sequences, during the paced and full speed sessions.  
434 Trained>untrained is shown in red, untrained>trained in blue/green. Trained sequences elicited higher  
435 dissimilarities than untrained in full speed, but not paced session (see **S7b** for statistical  $t$ -maps).

436

### 437 ***Striatal activity patterns for trained sequences manifest at full speed performance***

438 We observed learning-related changes in cortical association areas, but not in the primary motor  
439 cortex. Of course, learning could also be driven by neuronal changes in subcortical brain regions  
440 (Ashby, Turner, & Horvitz, 2010; Graybiel, 2016; Graybiel & Grafton, 2015; Hikosaka et al., 1999;  
441 Yin et al., 2009). The striatum in particular has been proposed as a structure where motor skills  
442 are stored (Kawai et al., 2015; Lehericy et al., 2006). Inspecting changes in overall activity across  
443 sessions, we observed no difference in activity between trained and untrained sequences in either  
444 putamen or caudate nucleus (**Fig. 8a**).

445 Previous experiments have reported that with learning, activation moves from more  
446 'cognitive' areas of the striatum (i.e. caudate nucleus) to more 'motor' areas (i.e. putamen)  
447 (Coynel et al., 2010; Lehericy et al., 2005; Reithler, van Mier, & Goebel, 2010). Our data fails to  
448 replicate this result: Both the visual inspection (**Fig. 8b**), and statistical quantification of the mean  
449 pattern difference for trained and untrained sequences across sessions revealed no such  
450 learning-specific shift of mean striatal activation pattern with learning.

451 Lastly, we examined if the striatum represents individual sequences. During the paced  
452 sessions, activity patterns for different sequences were not distinguishable in either caudate  
453 nucleus or putamen (**Fig. 8c**). However, during full speed performance trained sequences elicited  
454 distinct activity patterns in both regions (i.e. crossnobis dissimilarity > 0: caudate nucleus:  
455  $t_{(25)}=2.27$ ,  $p=0.032$ ; putamen:  $t_{(25)}=2.44$ ,  $p=.022$ ; **Fig. 8c**). This effect was specific to the trained  
456 sequences, with untrained sequences still exhibiting undistinguishable patterns of activity at full

457 speed. Thus, we found some evidence that trained motor sequences are represented in the form  
458 of distinct activity patterns in the striatum during full speed skilled performance.

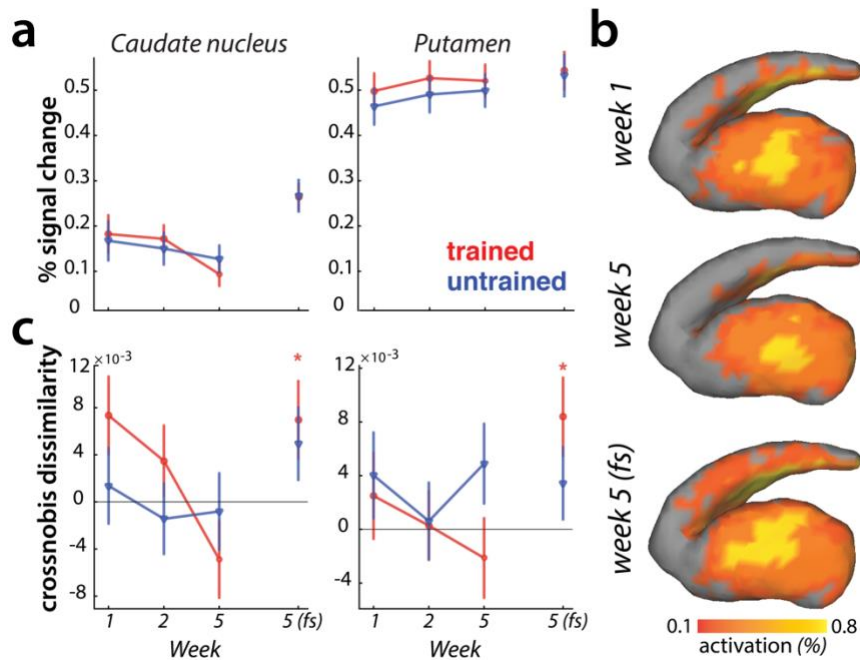

459  
460 **Figure 8. Striatal changes in activation and dissimilarities with learning.** **a)** Overall activation (percent  
461 signal change over resting baseline), for trained (red) and untrained (blue) sequences. Activation did not  
462 differ across sessions, or sequence types in the striatum. Error bars indicate the standard error across  
463 participants. **b)** Activation during performance of trained sequences in the striatum across weeks 1, 5  
464 (paced speed) and 5 (full speed – fs), averaged across sequences and participants. **c)** Crossnobis  
465 dissimilarities between activation patterns of sequence pairs, calculated separately for trained and  
466 untrained patterns. Dissimilarities were not significantly different for trained or untrained sequences during  
467 paced performance. At full speed, sequence-specific activity patterns amongst trained sequences differed  
468 significantly in both caudate nucleus and pallidum (\* indicates  $p < .05$ ). Error bars indicate the standard error  
469 across participants.

## Discussion

470  
471  
472 Here we present a large longitudinal motor sequence learning study that allowed us to  
473 systematically investigate several previously proposed fMRI signatures of motor learning,  
474 including one new hypothesis concerning the change in multivariate activity patterns with learning.  
475 The existing literature, with its diversity of experimental protocols and analysis approaches, does  
476 currently not provide a consistent picture of learning-related changes. This inconsistency is  
477 exacerbated by the fact that most papers prioritize making new claims over re-examining  
478 previously established findings. Consequently, it is very hard to assess the replicability of most  
479 past findings. We address this issue here by a) producing a well-powered, longitudinal data set  
480 that tackles some of the methodological inconsistencies (i.e. speed matching), b) pre-registering  
481 both design and hypotheses, and c) making data and analysis pipelines openly available, such  
482 that other hypotheses and analyses techniques can be freely tested.

483 Our findings reveal that parietal and premotor areas show widespread decreases in overall  
484 activation, as well as reorganization of sequence-specific patterns early in learning. Additionally,  
485 we observed that sequence specific patterns in these areas (as well as the striatum) were more  
486 distinct during full speed performance. In contrast to this set of results, none of these learning-  
487 specific metrics were detected in M1, even after 5 weeks of training.

488 On the one hand, our lack of any observable change in M1 activation contradicts some  
489 prior results, where increased activation in M1 was observed for matched performance after  
490 learning (Karni et al., 1995; Matsuzaka, Picard, & Strick, 2007; Penhune & Doyon, 2002; Steele  
491 & Penhune, 2010; Vahdat et al., 2015), and does not align with reports of M1 stimulations  
492 influencing consolidation or storage of motor skills (in motor sequence tasks: Kang & Paik, 2011;  
493 Nitsche et al., 2003; Reis et al., 2009; Waters-metenier, Husain, & Wiestler, 2014; in other motor  
494 tasks: Classen, Liepert, Wise, Hallett, & Cohen, 1998; Galea, Vazquez, Pasricha, Orban De Xivry,  
495 & Celnik, 2011; Hadipour-Niktarash, Lee, Desmond, & Shadmehr, 2007). We also found no  
496 support for a combination of increases and decreases of activation with training, which would lead  
497 to an overall change of the mean activity pattern (Steele & Penhune, 2010).

498 Instead, our results suggest that the pattern of neural activity in M1 does not change as  
499 participants become more skilled at producing motor sequences. This is consistent with a recent  
500 line of evidence demonstrating that M1 does not change activation with learning (Huang et al.,  
501 2013), and primarily encodes single movement elements, rather than sequences (Yokoi,  
502 Arbuckle, & Diedrichsen, 2018; Russo et al., 2019). Somewhat more surprisingly, we also  
503 observed no difference in overall M1 activation during full speed performance, when performance

504 was considerably faster for trained sequences. This suggests that the activity increases related  
505 to faster movement speeds are compensated for by the shorter duration spent on the task.

506 Primary somatosensory cortex in many ways paralleled the results observed in M1. We  
507 observed no overall activation change, or change in the sequence-specific pattern correlation  
508 across sessions. The only exception was the observed shift in the mean activation pattern across  
509 sessions. One possible explanation is that feedback-related sensory activity in S1 undergoes  
510 some plastic changes with learning. This is consistent with a recent study demonstrating that S1,  
511 but not M1, is involved during consolidation of motor skills (Kumar, Manning, & Ostry, 2019; for a  
512 review on somatosensory plasticity in motor learning see Ostry & Gribble, 2016).

513 In contrast to the limited evidence of learning-related changes in primary somatosensory  
514 and primary motor areas, higher order association areas (e.g. parietal and premotor cortices)  
515 displayed an array of learning-related changes. First, activation decreased in areas involved in  
516 sequence execution, with larger decreases for trained as compared to untrained sequences. This  
517 result contrasts with other previous studies reporting increases in activation in premotor areas  
518 with learning (Grafton et al., 2002; Honda et al., 1998; Penhune & Doyon, 2002; Vahdat et al.,  
519 2015). Partially responsible for these inconsistencies may be a publication bias, favoring reports  
520 of signal increases over signal decreases with learning. For example, a recent metaanalysis  
521 reanalyzed evidence for signal increases in the main text, while moving the (matched) evidence  
522 for signal decreases into the supplementary materials (Hardwick et al., 2013). Our data  
523 corroborates a number of recent studies reporting reduced activation in task-evoked premotor  
524 and parietal areas (Steele & Penhune, 2010; Wiestler & Diedrichsen, 2013; Wu et al., 2004).

525 The only activation increases for trained relative to untrained sequences were observed  
526 in areas that were suppressed below baseline during sequence execution. This has also been  
527 previously reported in a motor sequence learning study (Tamás Kincses et al., 2008), where  
528 deactivation was larger during performance of trained than random sequences. These areas  
529 include the precuneus, temporal parietal junction and the cingulate, regions commonly assigned  
530 to the default mode network (Raichle et al., 2001; Shulman et al., 1997). This group of regions is  
531 more activated during rest than during task performance, and has been associated with functions  
532 such as episodic memory retrieval and attention to internal states (Andrews-Hanna, Reidler,  
533 Sepulcre, Poulin, & Buckner, 2010; Gusnard, Akbudak, Shulman, & Raichle, 2001). Our  
534 observation of decreased inhibition of the default mode network likely reflects central attentional  
535 resources being freed up, allowing participants to engage in other mental processes (e.g.,  
536 daydreaming) while performing the task. Thus, this release from initial deactivation is possibly  
537 task-irrelevant, reflecting increased automaticity with learning (Shamloo & Helie, 2016).

538 Overall, changes in average activation are relatively hard to interpret, as they could reflect  
539 a combination of numerous factors. As a more direct fMRI metric of plasticity, we suggest to  
540 inspect changes in the sequence-specific activity patterns, since these constitute a more likely  
541 fMRI correlate of the sequences-specific performance advantage observed after training. In this  
542 project, this provided us with two key insights of how activation patterns reorganize in association  
543 areas with learning. First, activity patterns associated with each of individual trained sequences,  
544 changed to a greater extent earlier in learning, and stabilized later. This finding resonates with  
545 several animal studies suggesting that the emergence of skilled behavior is associated with early  
546 plasticity and later stabilization of neuronal activity patterns (Makino et al., 2017; Peters et al.,  
547 2017). Here we report a similar effect in humans, and advance these findings by demonstrating  
548 that this reorganization occurs at the level of sequence-specific patterns. In past studies using  
549 rodent models, sequence-specific patterns could not be dissociated from the overall activity  
550 pattern, as the animals were only trained on production of a single sequence. Additionally, by  
551 pacing participants' speed, we were able to cleanly dissociate changes in the organization of  
552 activity patterns from changes in the behavioral performance or variability. Second, activation  
553 patterns became more distinct for trained sequences at full speed. This indicates that the  
554 engagement of specific neuronal subpopulations for different sequences is particularly important  
555 when pushing the limit of performance.

556 While our study focused on the role of cortical areas in motor sequence learning, we also  
557 examined activation in the striatum, which has been suggested to play a critical role in skilled  
558 performance (Graybiel & Grafton, 2015; Kawai et al., 2015; Otchy et al., 2015). In contrast to  
559 previous fMRI studies (Coynel et al., 2010; Lehericy et al., 2006; Reithler, van Mier, & Goebel,  
560 2010), we did not find clear evidence for differences in overall activity, or shifts of the overall  
561 activity pattern with learning. Nonetheless, we observed distinguishable striatal activation patterns  
562 for different trained sequences at full speed, in line with a recent report showing distinguishable  
563 striatal patterns for performance of consolidated motor sequences (Pinsard et al., 2018). While  
564 by itself the finding of differential sequence-specific activity patterns is not evidence for a causal  
565 role of the striatum in the production of skilled behaviors, it is a necessary condition for such a  
566 functional role. Therefore, our results here are in line with the proposed involvement of the  
567 striatum in motor sequence learning.

568 An important feature of our design was that we collected imaging data in the trained state,  
569 both when performance was clamped to the initial speed, and when participants performed as  
570 fast as possible. Previous studies have usually included only one of these two options, making  
571 direct comparisons difficult (see Lutz et al., 2004 for an examination of various execution speeds

572 on BOLD activity and Orban et al., 2010 in a motor learning context). Our results provide two  
573 important insights: first, in terms of the overall fMRI activation, the pattern of results remained the  
574 same for paced vs. full speed performance. This indicates that, in this specific case, the increased  
575 motor demands and the decreased time on task averaged out. In general, however, these two  
576 factors may not balance perfectly – therefore paced performance may be a better choice when  
577 comparing overall activation across sessions. Second, even though slow and paced performance  
578 in the trained state activated sequence-specific activation patterns, these were much stronger  
579 when performing at maximal speeds. Thus, for questions regarding the fine-grained patterns, it  
580 might be more suitable to challenge the system fully.

581 Of course, our list of inspected fMRI metrics of learning was not exhaustive. For instance,  
582 we did not investigate whether various fMRI correlates of learning predict behavioral outcomes,  
583 or how functional connectivity and network metrics change with learning, partly because of the  
584 absence of specific predictions. Pre-registration of hypothesis are especially important for these  
585 analyses, since the search space of possible tests becomes exponentially larger (e.g. correlating  
586 all possible brain metrics with all possible behavioral metrics; or using various metrics to assess  
587 inter-regional relationships). However, we hope that our dataset, upon its public release, can  
588 serve as a resource for other researchers to (re-)test novel predictions about learning related  
589 changes.

590

## 591 **Conclusion**

592 The search for neural substrates of learning is a daunting task: the acquisition of longitudinal data  
593 sets is work intensive, and the large dimensionality of possible brain metrics makes the search  
594 difficult (Poldrack, 2000). Historically, the question was simplified by studying activation increases  
595 in single areas as proxies for motor ‘engram’ localization (Berlot, Popp, & Diedrichsen, 2018).  
596 Here we found no evidence for such activation increases; instead we observed widespread and  
597 distributed decreases in activation across cortical areas. In contrast, subtler changes in the  
598 distributed patterns of fMRI activity have the potential to provide more direct metrics of plasticity.  
599 Increased pattern reorganization (across weeks), and larger pattern separation for trained  
600 sequences was found across prefrontal, parietal, and striatal regions. These metrics may be  
601 useful as general fMRI correlates of neural reorganization beyond the domain of motor learning.

## 602 **Materials and Methods**

603  
604

### 605 ***Participants***

606 Twenty-seven volunteers participated in the experiment. One of them was excluded because field  
607 map acquisition was distorted in one of the four scans. The average age of the remaining 26  
608 participants was 22.2 years (SD = 3.3 years), and the sample included 17 women and 9 men. All  
609 participants were right-handed and had no prior history of psychiatric or neurological disorders.  
610 They provided written informed consent to all procedures and data usage before the study started.  
611 The experimental procedures were approved by the Ethics Committee at Western University.

612

### 613 ***Apparatus***

614 Participants performed finger sequences with their right hand on an MRI-compatible keyboard  
615 (**Fig. 2a**), with keys numbered 1-5 for thumb-little finger. The keys had a groove for each fingertip  
616 and were not depressible. The force of isometric finger presses was measured by the force  
617 transducers (FSG-15N1A, Sensing and Control, Honeywell; dynamic range 0-25 N) mounted  
618 underneath each key with an update rate of 2 ms. A key press was recognized when the sensor  
619 force exceeded 1 N. The measured signal was amplified and sampled at 200 Hz.

620

### 621 ***Learning paradigm***

622 Participants were trained to execute six 9-digit finger sequences over a period of five weeks (**Fig.**  
623 **2a**). They were split into two groups with trained sequences of one group constituting the  
624 untrained sequences for the other group and vice versa. Finger sequences of both groups were  
625 matched as closely as possible in terms of the starting finger, number of finger repetitions in a  
626 sequence and first-order finger transitions. This counterbalancing between the groups ensured  
627 that any of the observed results were not specific to a set of chosen trained sequences.

628 In the pre-training session prior to the first scan (**Fig. 2b**), participants were acquainted  
629 with the apparatus and task performed during scanning. Sequences executed during this pre-  
630 training session were not encountered later on in the experiment.

631 During the training sessions, participants were trained to perform the six sequences as  
632 fast as possible. They received visual feedback for the correctness of their presses with digits  
633 turning green for a correct finger press and red for an incorrect one. After each trial, participants  
634 received points based on the accuracy and their movement time (MT – time from the first press  
635 until the last finger release in the sequence; **Fig. 2c**). Trials executed correctly and faster than  
636 participant's median MT from the previous blocks were rewarded with 1 point. If participants

637 performed correctly and 20% faster than the median MT from previous blocks, they received 3  
638 points. If they made a mistake or performed below their median MT, they received 0 points.  
639 Participants performed each sequence twice in a row: digits were written on the screen for the  
640 first execution, but removed for the second execution so that participants had to perform the finger  
641 sequence from memory. Training sessions were broken into several blocks, each consisting of  
642 24 trials (4 trials per trained sequence), with time between blocks to rest. At the end of each block,  
643 participants received feedback on their error rate, median MT and points obtained during the  
644 block. If participants performed with an error of <15% and faster than the previous median MT,  
645 the MT threshold was updated. This design feature was chosen to maintain participants'  
646 motivation to execute the sequences as fast as possible, within the allowed error range.

647 During the behavioral test sessions (**Fig. 2d**), participants executed sequences they were  
648 trained on as well as untrained matched sequences, which were randomly interspersed. All  
649 sequences were still performed twice in a row, with numbers on the screen present on both  
650 executions.

651  
652 ***Experimental design during scanning***

653 Participants underwent four scanning sessions (**Fig. 2d**) – with the first one before learning regime  
654 started, the second after a week and two more scans after completion of the 5 training weeks.  
655 Each scanning session consisted of eight functional runs. We employed an event-related design,  
656 randomly intermixing execution of trained and untrained sequences. Each sequence was  
657 repeated twice in a row (with digits always present on the screen), and there was a total of six  
658 repetitions per sequence in every run. Each trial started with 1 second preparation time, during  
659 which the sequence was presented on the screen. After that time, a 'go' signal was displayed as  
660 short pink line underneath the sequence numbers. In scanning sessions 1-3, this line started  
661 expanding below the written numbers, indicating the speed at which participants were required to  
662 press along. In scanning session 4, only a short line was presented in front and underneath the  
663 sequences. When the line disappeared, this signaled a 'go' cue for participants to execute the  
664 presented sequence as fast as possible. The execution phase including the feedback on overall  
665 performance lasted for 3.5 seconds, and the inter-trial interval was 0.5 seconds (see  
666 supplementary figure **S2**). Each trial lasted for 5 seconds. Five periods of rest, each 10 seconds  
667 long, were added randomly between trials in each run to provide a better estimate of baseline  
668 activation.

669  
670 ***Image acquisition***



671 Data was acquired on a 7-Tesla Siemens Magnetom scanner with a 32-receive channel head coil  
672 (8-channel parallel transmit). Anatomical T1-weighted scan was acquired at the beginning of the  
673 first scanning session, using a magnetization-prepared rapid gradient echo sequence (MPRAGE)  
674 with voxel size of 0.75x0.75x0.75 mm isotropic (field of view = 208 x 157 x 110 mm [A-P; R-L; F-  
675 H], encoding direction coronal). Functional data were acquired using a sequence (GRAPPA 3,  
676 multi-band acceleration factor 2, repetition time [TR] = 1.0 s, echo time [TE] = 20 ms, flip angle  
677 [FA] = 30 deg). We acquired 44 slices with isotropic voxel size of 2x2x2 mm. For estimating  
678 magnetic field inhomogeneities, we additionally acquired a gradient echo field map. Acquisition  
679 was in the transversal orientation with field of view 210 x 210 x 160 mm and 64 slices with 2.5  
680 mm thickness (TR = 475 ms, TE = 4.08 ms, FA = 35 deg).

681

### 682 ***First-level analysis***

683 Functional data were analyzed using SPM12 and custom written MATLAB code. Functional runs  
684 were corrected for geometric distortions using fieldmap data (Hutton et al., 2002), and head  
685 movements during the scan (3 translations: x, y, z; 3 rotations: pitch, roll, yaw), and aligned across  
686 sessions to the first run of the first session. The functional data were then co-registered to the  
687 anatomical scan. No smoothing or normalization to an atlas template was performed.

688 Preprocessed data were analyzed using a general linear model (GLM; Friston et al.,  
689 1994). Each of the performed sequences was defined as a separate regressor per imaging run,  
690 resulting in 12 regressors per run (6 trained, 6 untrained sequences), together with intercept for  
691 each of the functional runs. The regressor was a boxcar function starting at the beginning of the  
692 trial and lasting for trial duration. The boxcar function was convolved with a hemodynamic  
693 response function, with a time to peak of 5.5 seconds, and a manually adjusted onset to best fit  
694 each participant's average evoked response. This analysis resulted in one activation estimate  
695 (beta image) for each of the 12 conditions per run, in each scanning session.

696

### 697 ***Surface reconstruction and regions of interest***

698 We reconstructed individual subjects' cortical surfaces using FreeSurfer (Dale, Fischl, & Sereno,  
699 1999). All individual surfaces were aligned to the FreeSurfer's Left-Right symmetric template  
700 (workbench, 164k nodes) via spherical registration. To detect sequence representation across  
701 the cortical surface, we used a surface-based searchlight approach (Oosterhof, Wiestler,  
702 Downing, & Diedrichsen, 2011), where for each node we selected a circular region of 120 voxels  
703 in the grey matter. The resulting analyses (dissimilarities between sequence-specific activity  
704 patterns, see below) was assigned to the center node. As a slightly coarser alternative to

705 searchlights, we performed regular tessellation of cortical surface into 162 tessels per  
706 hemisphere. This allowed us to fit correlation models (see below) across the cortical surface,  
707 while not being as computationally intensive as searchlight analyses.

708 We defined four regions of interest to cover primary somato-motor regions as well as  
709 secondary associative regions. M1 was defined using probabilistic cytoarchitectonic map (Fischl  
710 et al., 2008) by including nodes with the highest probability of belonging to Brodmann area (BA)  
711 4, while excluding nodes more than 2.5 cm from the hand knob (Yousry et al., 1997). Similarly,  
712 S1 was defined as nodes related to hand representation in BA 1, 2 and 3. Additionally, we included  
713 dorsal premotor cortex (PMd) as the lateral part of the middle frontal gyrus. The anterior part of  
714 the superior parietal lobule (SPLa) was defined to include anterior, medial and ventral intraparietal  
715 sulcus. We also defined caudate nucleus and putamen as striatal regions of interest. The  
716 definition was carried out in each subject using FSL's subcortical segmentation.

717

### 718 ***Changes in overall activation***

719 We calculated the average percent signal change for trained and untrained sequences (averaged  
720 across the 6 trained and 6 untrained sequences) relative to the baseline for each voxel. The  
721 resulting volume map was projected to the surface for each subject, and a group statistical  $t$ -map  
722 was generated across subjects. Statistical maps were thresholded at  $p < .01$ , uncorrected, and the  
723 family-wise error corrected  $p$ -value for the size of the peak activation and activation cluster size  
724 was determined using a permutation test. Specifically, we ran 1000 simulations where we  
725 randomly flipped the sign of the contrast for subjects (chosen at random out of  $2^{26}$  possible  
726 permutations). The rationale behind this is that under the null hypothesis, there should be no  
727 difference between the two conditions, and the sign of each contrast should be interchangeable.  
728 As for the data, we thresholded the statistical map from each permutation, and recorded the peak  
729  $t$ -value (across the map) and the size of the largest cluster. The real data was then compared  
730 against this distribution to assess the probability of the observed  $t$ -value and cluster-size under  
731 the null hypothesis.

732 Additionally, we assessed changes in percent signal in predefined regions of interest (M1,  
733 S1, PMd, SPLa). This was performed in the native volume space of each subject. To do so, we  
734 averaged the percent signal change of voxels belonged to a defined region per subject and  
735 quantified activation changes across subjects using ANOVAs and  $t$ -tests across subjects.

736 Besides overall activation, we also examined *relative* changes in elicited activation for  
737 trained sequences across sessions. This was done by normalizing (z-scoring) the percent signal  
738 change surface maps across voxels, separately for each subject. Normalization was applied both

739 map-wise (for **Fig. 5b**), as well as for each of the pre-defined ROIs separately (for cross-sections  
740 in **Fig. 5c**). Statistical assessment of the difference between relative evoked activation pattern for  
741 trained vs. untrained sequence was carried out by calculating cosine angle dissimilarities between  
742 the mean evoked patterns. Cosine angle dissimilarity was chosen because it is not sensitive to  
743 overall magnitude in activation, and therefore assesses the difference in the relative activation  
744 distribution.

745

#### 746 ***Dissimilarities between sequence-specific activity patterns***

747 To evaluate which cortical areas display sequence-specific encoding, we performed a searchlight  
748 analysis calculating the dissimilarities between evoked beta patterns of individual sequences.  
749 Beta patterns were first multivariately prewhitened (standardized by voxels' residuals and  
750 weighted by the voxel covariance matrix), which has been found to increase the reliability of  
751 dissimilarity estimates (Walther et al., 2016). We then calculated the cross-validated squared  
752 Mahalanobis dissimilarities (i.e. crossnobis dissimilarities) between evoked sequence patterns  
753 (66 dissimilarity pairs for 6 trained and 6 untrained sequences). These dissimilarities were then  
754 averaged overall, as well as separately for pairs within trained sequences, and within untrained  
755 sequences. This metric was used both for searchlight analysis and calculation of metric within  
756 predefined regions (cortical and striatal). The cortex surface maps contrasting dissimilarities  
757 between trained and untrained sequences were corrected for multiple comparisons using  
758 permutations, as described above for percent signal change surface maps.

759

#### 760 ***Pattern component analyses: modelling sequence-specific correlation across sessions***

761 Correspondence of sequence-specific patterns across sessions was quantified using pattern  
762 component modelling (PCM; Diedrichsen et al., 2017). This framework is superior at estimating  
763 correlations than simply performing Pearson's correlation on raw activity patterns, or even in a  
764 crossvalidated fashion. The main problem with estimating correlations on data is that activation  
765 patterns are biased by noise, which varies across scanning sessions, and would therefore  
766 underestimate the true correlation. PCM separately models the noise and signal component, and  
767 can in this way combat the issue more than simply performing crossvalidation would. We  
768 designed 30 correlation models with correlations between 0 and 1 in equal step sizes and  
769 assessed the group likelihood of the observed data under each model.

770 Subsequent group inferences were performed using crossvalidated approach on  
771 assessing individual log-Bayes factors (model evidence). A crossvalidated approach was used to  
772 ensure that our choice of 'best-fitting models' and the evidence associated was independent and

773 did not involve double-dipping. Specifically, we used n-1 subjects to determine the best-fitting  
774 models for trained and untrained patterns and recorded the log-Bayes factors for those two  
775 correlation models on the left-out subject. This was repeated across all subjects and a t-test was  
776 performed on the recorded log-Bayes factors (i.e. out-of-sample model evidences). The same  
777 evaluation was performed for pre-defined regions of interest (**Fig. 6b**), as well as a regular  
778 tessellation across the cortical surface (**Fig. 6c**).

779  
780

### 781 **Acknowledgements**

782 The work was supported by an Ontario Trillium Scholarship to EB, an NSERC Discovery  
783 Grant (RGPIN-2016-04890) to JD, and the Canada First Research Excellence Fund  
784 (BrainsCAN). We thank Giacomo Ariani, Tamar Makin, Andrew Pruszynski, and Atsushi  
785 Yokoi for helpful comments on the manuscript.

786  
787

### 788 **Author contributions**

789 EB, NJP and JD designed the experiment; EB and NJP programmed the experiment;  
790 EB and NJP collected the data; EB analyzed the data; EB prepared figures; EB drafted  
791 manuscript; EB, NJP and JD edited and revised the manuscript.

792  
793

### 794 **Competing interests**

795 The authors declare no competing interests.

## 796 Supplementary Figures

797

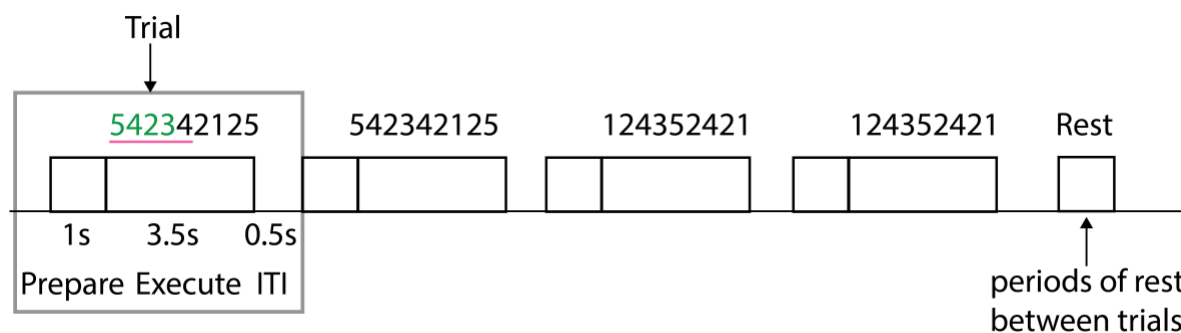

798

799 **Figure S2. Experimental trial structure during scanning sessions.** Each trial consisted of a preparation  
800 period, execution period and inter-trial-interval (ITI), during which the feedback was presented on  
801 correctness of the trial. Each sequence was presented twice in a row. Periods of rest were added in-  
802 between the trials.

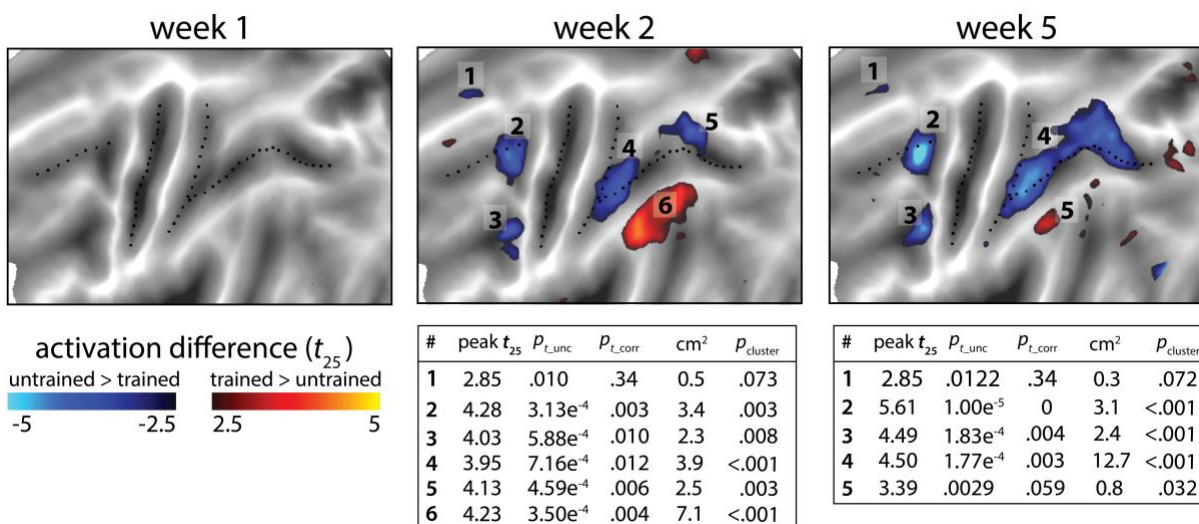

803  
 804 **Figure S4. Statistical maps for the trained vs. untrained contrasts on elicited activation in each**  
 805 **session.** Trained>untrained is shown in red, untrained>trained in blue. Maps were thresholded at a  
 806  $t_{25}=\pm 2.5$ ,  $p<.01$  uncorrected for a two-sided  $t$ -test. Tables show peak  $t$ -value and size (in cm<sup>2</sup>) for each  
 807 super-threshold cluster (indicated by numbers) for maps of week 2 and 5.  $p_{L,unc}$  is the uncorrected  $p$ -value  
 808 for the peak of each cluster. Family-wise error corrected  $p$ -values were determined using permutation  
 809 testing for the peak  $t$ -value ( $p_{L,corr}$ ) and cluster size ( $p_{cluster}$ ).

### Trained vs. untrained max correlation

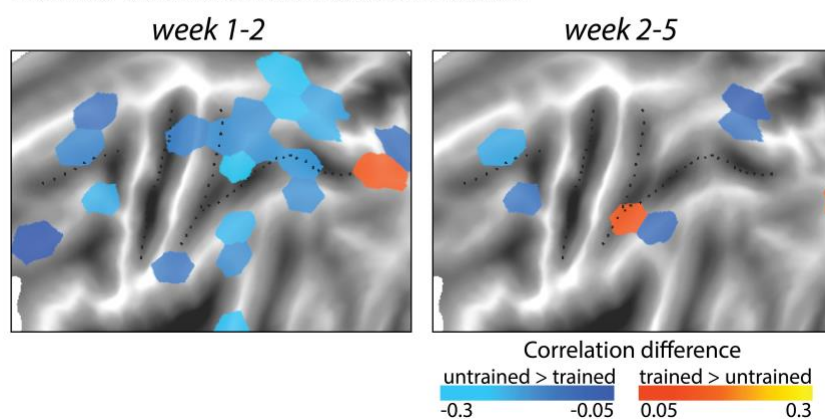

810  
811 **Figure S6. Difference between correlation of winning model for trained and untrained sequences.**  
812 Difference between the correlations of the winner models for trained and untrained sequences, separately  
813 for week 1-2 and week 2-5. Blue indicates a lower correlation across weeks for trained than untrained  
814 patterns of activity. The correlation difference values are plotted in tessels where the difference in model  
815 evidence was significant, as based on the cross-validated  $t$ -test (for two-sided  $p < .05$ ).

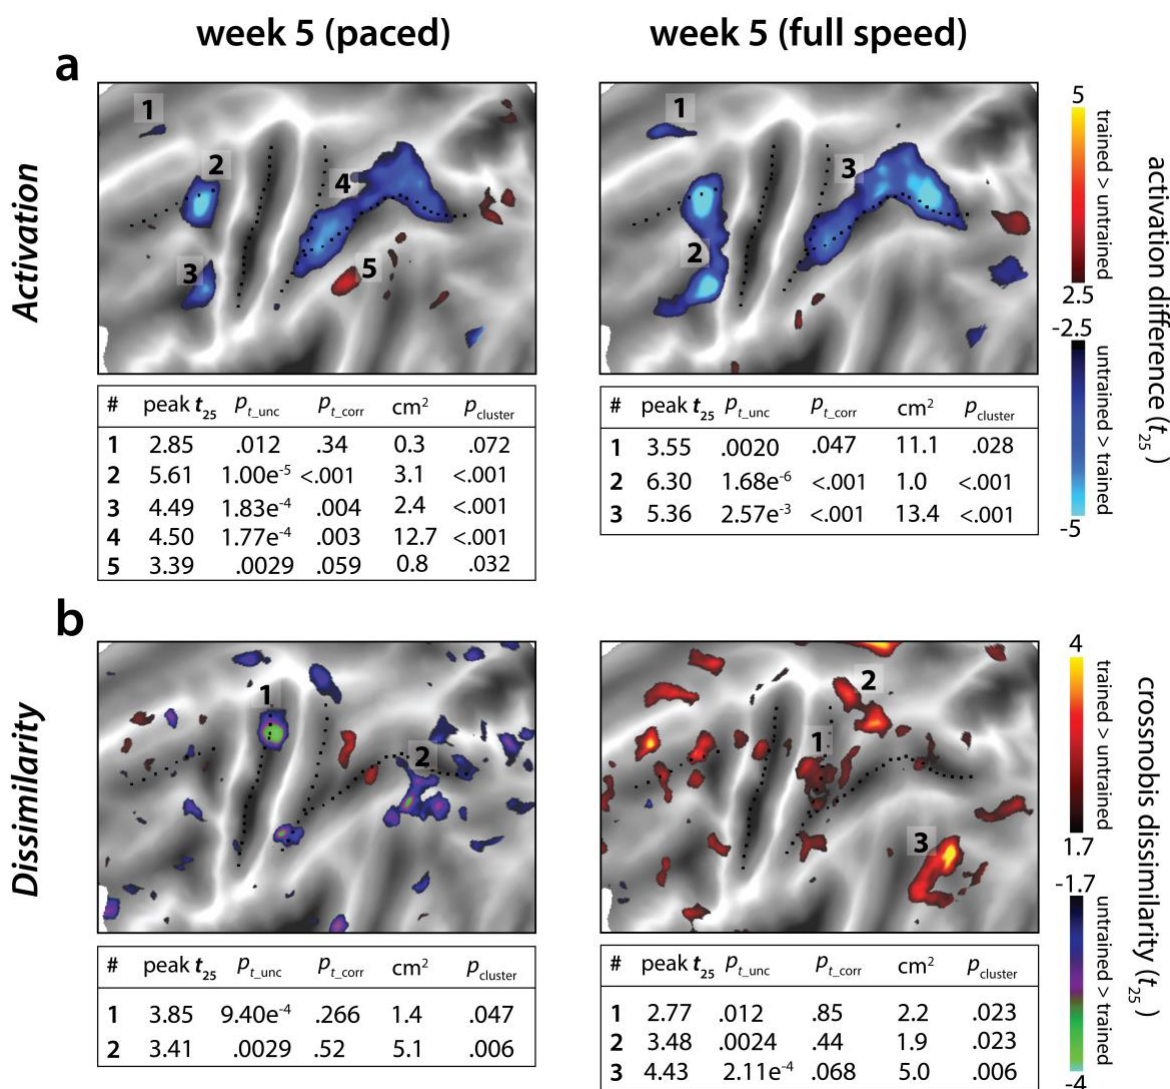

816  
817  
818  
819  
820  
821  
822  
823  
824

**Figure S7. Statistical maps for trained vs. untrained contrasts in week 5 (paced) and 5\* (full speed) sessions.** Trained>untrained is shown in red, untrained>trained in blue. **a)** Statistical contrast for average activation. Maps were thresholded at a  $t_{25}=\pm 2.5$ ,  $p<.01$  uncorrected for a two-sided  $t$ -test. Tables show peak  $t$ -value and size (in cm<sup>2</sup>) for each super-threshold cluster.  $p_{t\_unc}$  is the uncorrected p-value for the peak of each cluster. Family-wise error corrected  $p$ -values were determined using permutation testing for the peak  $t$ -value ( $p_{t\_corr}$ ) and cluster size ( $p_{cluster}$ ). **b)** Statistical contrast for average dissimilarity of sequence-specific activity pattern. Map was thresholded at  $t_{25}=\pm 1.7$ ,  $p<.05$ , uncorrected. Statistical quantification using permutation tests is in the table below each map.



825 **References:**

- 826 Andrews-Hanna, J. R., Reidler, J. S., Sepulcre, J., Poulin, R., & Buckner, R. L. (2010).  
827 Functional-Anatomic Fractionation of the Brain's Default Network. *Neuron*, 65(4), 550–562.  
828 <http://doi.org/10.1016/j.neuron.2010.02.005>
- 829 Ashby, F. G., Turner, B. O., & Horvitz, J. C. (2010). Cortical and basal ganglia contributions to  
830 habit learning and automaticity. *Trends in Cognitive Sciences*, 14(5), 208–215.  
831 <http://doi.org/10.1016/j.tics.2010.02.001>
- 832 Bassett, D. S., Wymbs, N. F., Porter, M. A., Mucha, P. J., Carlson, J. M., & Grafton, S. T.  
833 (2010). Dynamic reconfiguration of human brain networks during learning. *Proceedings of*  
834 *the National Academy of Sciences*, 108(18), 7641–7646.  
835 <http://doi.org/10.1073/pnas.1018985108>
- 836 Bassett, D. S., Yang, M., Wymbs, N. F., & Grafton, S. T. (2015). Learning-Induced Autonomy of  
837 Sensorimotor Systems. *Nature Neuroscience*, 18(5), 744–751.  
838 <http://doi.org/10.1038/nn.3993>
- 839 Berlot, E., Popp, N., & Diedrichsen, J. (2017, August 29). Neural correlates of long-term motor  
840 sequence learning. Retrieved from [osf.io/etnqc](http://osf.io/etnqc)
- 841 Berlot, E., Popp, N. J., & Diedrichsen, J. (2018). In search of the engram, 2017. *Current Opinion*  
842 *in Behavioral Sciences*, 20. <http://doi.org/10.1016/j.cobeha.2017.11.003>
- 843 Beukema, P., Diedrichsen, J., & Verstynen, T. D. (2019). Binding During Sequence Learning  
844 Does Not Alter Cortical Representations of Individual Actions. *The Journal of*  
845 *Neuroscience*, 39(35), 6968–6977. <http://doi.org/10.1523/jneurosci.2669-18.2019>
- 846 Classen, J., Liepert, J., Wise, S. P., Hallett, M., & Cohen, L. G. (1998). Rapid plasticity of human  
847 cortical movement representation induced by practice. *Journal of Neurophysiology*, 79(2),  
848 1117–1123. <http://doi.org/10.1152/jn.1998.79.2.1117>
- 849 Coynel, D., Marrelec, G., Perlberg, V., Péligrini-Issac, M., Van de Moortele, P. F., Ugurbil, K.,  
850 ... Lehericy, S. (2010). Dynamics of motor-related functional integration during motor  
851 sequence learning. *NeuroImage*, 49(1), 759–766.  
852 <http://doi.org/10.1016/j.neuroimage.2009.08.048>
- 853 Dale, A. M., Fischl, B., & Sereno, M. I. (1999). Cortical Surface-Based Analysis. *NeuroImage*,  
854 9(2), 179–194. <http://doi.org/10.1006/nimg.1998.0395>
- 855 Dayan, E., & Cohen, L. G. (2011). Neuroplasticity subserving motor skill learning. *Neuron*,  
856 72(3), 443–454. <http://doi.org/10.1016/j.neuron.2011.10.008>
- 857 Diedrichsen, J., Yokoi, A., & Arbuckle, S. A. (2017). Pattern component modeling: A flexible  
858 approach for understanding the representational structure of brain activity patterns.  
859 *NeuroImage*. <http://doi.org/10.1016/j.neuroimage.2017.08.051>
- 860 Doyon, J., Song, A. W., Karni, A., Lalonde, F., Adams, M. M., & Ungerleider, L. G. (2002).  
861 Experience-dependent changes in cerebellar contributions to motor sequence learning.  
862 *Proceedings of the National Academy of Sciences of the United States of America*, 99(2),  
863 1017–22. <http://doi.org/10.1073/pnas.022615199>
- 864 Fischl, B., Rajendran, N., Busa, E., Augustinack, J., Hinds, O., Yeo, B. T. T., ... Zilles, K. (2008).  
865 Cortical folding patterns and predicting cytoarchitecture. *Cerebral Cortex*, 18(8), 1973–  
866 1980. <http://doi.org/10.1093/cercor/bhm225>
- 867 Floyer-Lea, A., & Matthews, P. M. (2005). Distinguishable brain activation networks for short-  
868 and long-term motor skill learning. *Journal of Neurophysiology*, 94(1), 512–518.  
869 <http://doi.org/10.1152/jn.00717.2004>
- 870 Friston, K. J., Worsley, K. J., Poline, J.-P. B., Frith, C. D., Frackowiak, R. S. J., Holmes, a. P.,  
871 ... Frackowiak, R. S. J. (1994). Statistical parametric maps in functional imaging: A general  
872 linear approach. *Human Brain Mapping*, 2(4), 189–210.  
873 <http://doi.org/10.1002/hbm.460020402>
- 874 Galea, J. M., Vazquez, A., Pasricha, N., Orban De Xivry, J. J., & Celnik, P. (2011). Dissociating

- 875 the roles of the cerebellum and motor cortex during adaptive learning: The motor cortex  
876 retains what the cerebellum learns. *Cerebral Cortex*, 21(8), 1761–1770.  
877 <http://doi.org/10.1093/cercor/bhq246>
- 878 Grafton, S. T., Hazeltine, E., & Ivry, R. (1995). Functional mapping of sequence learning in  
879 normal humans. *Journal of Cognitive Neuroscience*, 7(4), 497–510.  
880 <http://doi.org/10.1162/jocn.1995.7.4.497>
- 881 Grafton, S. T., Hazeltine, E., & Ivry, R. B. (2002). Motor sequence learning with the  
882 nondominant left hand: A PET functional imaging study. *Experimental Brain Research*,  
883 146(3), 369–378. <http://doi.org/10.1007/s00221-002-1181-y>
- 884 Graybiel, A. M. (2016). The Basal Ganglia. *Principles of Neural Science*, 982–998.  
885 <http://doi.org/10.1007/978-3-319-42743-0>
- 886 Graybiel, A. M., & Grafton, S. T. (2015). The striatum: Where skills and habits meet. *Cold Spring*  
887 *Harbor Perspectives in Biology*, 7(8), 1–14. <http://doi.org/10.1101/cshperspect.a021691>
- 888 Gusnard, D. A., Akbudak, E., Shulman, G. L., & Raichle, M. E. (2001). Medial prefrontal cortex  
889 and self-referential mental activity: Relation to a default mode of brain function.  
890 *Proceedings of the National Academy of Sciences of the United States of America*, 98(7),  
891 4259–4264. <http://doi.org/10.1073/pnas.071043098>
- 892 Hadipour-Niktarash, A., Lee, C. K., Desmond, J. E., & Shadmehr, R. (2007). Impairment of  
893 retention but not acquisition of a visuomotor skill through time-dependent disruption of  
894 primary motor cortex. *Journal of Neuroscience*, 27(49), 13413–13419.  
895 <http://doi.org/10.1523/JNEUROSCI.2570-07.2007>
- 896 Hardwick, R. M., Rottschy, C., Miall, R. C., & Eickhoff, S. B. (2013). A quantitative meta-analysis  
897 and review of motor learning in the human brain. *NeuroImage*, 67, 283–297.  
898 <http://doi.org/10.1016/j.neuroimage.2012.11.020>
- 899 Hazeltine, E., Grafton, S. T., & Ivry, R. (1997). Attention and stimulus characteristics determine  
900 the locus of motor-sequence encoding. A PET study. *Brain*, 120(1), 123–140.  
901 <http://doi.org/10.1093/brain/120.1.123>
- 902 Hikosaka, O., Sakai, K., Lu, X., Nakahara, H., Rand, M. K., Nakamura, K., ... Doya, K. (1999).  
903 Parallel neural networks for learning sequential procedures. *Trends in Neurosciences*,  
904 22(10), 464–471. [http://doi.org/10.1016/S0166-2236\(99\)01439-3](http://doi.org/10.1016/S0166-2236(99)01439-3)
- 905 Honda, M., Deiber, M. P., Ibáñez, V., Pascual-Leone, A., Zhuang, P., & Hallett, M. (1998).  
906 Dynamic cortical involvement in implicit and explicit motor sequence learning. A PET study.  
907 *Brain*, 121(11), 2159–2173. <http://doi.org/10.1093/brain/121.11.2159>
- 908 Huang, Y., Zhen, Z., Song, Y., Zhu, Q., Wang, S., & Liu, J. (2013). Motor Training Increases the  
909 Stability of Activation Patterns in the Primary Motor Cortex. *PLoS ONE*, 8(1).  
910 <http://doi.org/10.1371/journal.pone.0053555>
- 911 Hutton, C., Bork, A., Josephs, O., Deichmann, R., Ashburner, J., & Turner, R. (2002). Image  
912 distortion correction in fMRI: A quantitative evaluation. *NeuroImage*, 16(1), 217–240.  
913 <http://doi.org/10.1006/nimg.2001.1054>
- 914 Jenkins, I. H., Brooks, D. J., Nixon, P. D., Frackowiak, R. S. J., & Passingham, R. E. (1994).  
915 Motor sequence learning: A study with positron emission tomography. *Journal of*  
916 *Neuroscience*, 14(6), 3775–3790. <http://doi.org/10.1523/jneurosci.14-06-03775.1994>
- 917 Kang, E. K., & Paik, N. J. (2011). Effect of a tDCS electrode montage on implicit motor  
918 sequence learning in healthy subjects. *Experimental and Translational Stroke Medicine*,  
919 3(1), 2–7. <http://doi.org/10.1186/2040-7378-3-4>
- 920 Karni, A., Meyer, G., Jezzard, P., Adams, M. M., Turner, R., & Ungerleider, L. G. (1995).  
921 Functional MRI evidence for adult motor cortex plasticity during motor skill learning. *Nature*,  
922 377(6545), 155–8. <http://doi.org/10.1038/377155a0>
- 923 Karni, A., Meyer, G., Rey-Hipolito, C., Jezzard, P., Adams, M. M., Turner, R., & Ungerleider, L.  
924 G. (1998). The acquisition of skilled motor performance: fast and slow experience-driven  
925 changes in primary motor cortex. *Proceedings of the National Academy of Sciences of the*

- 926 *United States of America*, 95(3), 861–8. <http://doi.org/10.1073/pnas.95.3.861>
- 927 Kawai, R., Markman, T., Poddar, R., Ko, R., Fantana, A. L., Dhawale, A. K., ... Ölveczky, B. P.  
928 (2015). Motor Cortex Is Required for Learning but Not for Executing a Motor Skill. *Neuron*,  
929 86(3), 800–812. <http://doi.org/10.1016/j.neuron.2015.03.024>
- 930 Kumar, N., Manning, T. F., & Ostry, D. J. (2019). Somatosensory cortex participates in the  
931 consolidation of human motor memory. *PLoS Biology*, 17(10), e3000469.  
932 <http://doi.org/10.1371/journal.pbio.3000469>
- 933 Lashley, K. (1950). In search of the engram.
- 934 Lehéricy, S., Bardinet, E., Tremblay, L., Van de Moortele, P. F., Pochon, J. B., Dormont, D., ...  
935 Ugurbil, K. (2006). Motor control in basal ganglia circuits using fMRI and brain atlas  
936 approaches. *Cerebral Cortex (New York, N.Y. : 1991)*, 16(2), 149–61.  
937 <http://doi.org/10.1093/cercor/bhi089>
- 938 Lehéricy, S., Benali, H., Van de Moortele, P.-F., Péligrini-Issac, M., Waechter, T., Ugurbil, K., &  
939 Doyon, J. (2005). Distinct basal ganglia territories are engaged in early and advanced  
940 motor sequence learning. *Proceedings of the National Academy of Sciences of the United*  
941 *States of America*, 102(35), 12566–12571. <http://doi.org/10.1073/pnas.0502762102>
- 942 Lutz, K., Koeneke, S., Wüstenberg, T., & Jäncke, L. (2004). Asymmetry of cortical activation  
943 during maximum and convenient tapping speed. *Neuroscience Letters*, 373(1), 61–66.  
944 <http://doi.org/10.1016/j.neulet.2004.09.058>
- 945 Ma, L., Wang, B., Narayana, S., Hazeltine, E., Chen, X., Robin, D. A., ... Xiong, J. (2010).  
946 Changes in regional activity are accompanied with changes in inter-regional connectivity  
947 during 4 weeks motor learning. *Brain Research*, 1318, 64–76.  
948 <http://doi.org/10.1016/j.brainres.2009.12.073>
- 949 Makino, H., Ren, C., Liu, H., Kim, A. N., Kondapaneni, N., Liu, X., ... Komiyama, T. (2017).  
950 Transformation of Cortex-wide Emergent Properties during Motor Learning. *Neuron*, 94(4),  
951 880–890.e8. <http://doi.org/10.1016/j.neuron.2017.04.015>
- 952 Matsuzaka, Y., Picard, N., & Strick, P. L. (2007). Skill representation in the primary motor cortex  
953 after long-term practice. *Journal of Neurophysiology*, 97(2), 1819–1832.  
954 <http://doi.org/10.1152/jn.00784.2006>
- 955 Mattar, M., Wymbs, N. F., Bock, A. S., Aguirre, G. K., Grafton, S. T., & Basset, D. S. (2016).  
956 Predicting future learning from baseline network architecture. *bioRxiv*, 172(November  
957 2017), 56861. <http://doi.org/10.1101/056861>
- 958 Nitsche, M. A., Schauenburg, A., Lang, N., Liebentanz, D., Exner, C., Paulus, W., & Tergau, F.  
959 (2003). Facilitation of implicit motor learning by weak transcranial direct current stimulation  
960 of the primary motor cortex in the human. *Journal of Cognitive Neuroscience*, 15(4), 619–  
961 626. <http://doi.org/10.1162/089892903321662994>
- 962 Oosterhof, N. N., Wiestler, T., Downing, P. E., & Diedrichsen, J. (2011). A comparison of  
963 volume-based and surface-based multi-voxel pattern analysis. *NeuroImage*, 56(2), 593–  
964 600. <http://doi.org/10.1016/j.neuroimage.2010.04.270>
- 965 Orban, P., Peigneux, P., Lungu, O., Albouy, G., Breton, E., Laberrenne, F., ... Doyon, J. (2010).  
966 The multifaceted nature of the relationship between performance and brain activity in motor  
967 sequence learning. *NeuroImage*, 49(1), 694–702.  
968 <http://doi.org/10.1016/j.neuroimage.2009.08.055>
- 969 Ostry, D. J., & Gribble, P. L. (2016). Sensory Plasticity in Human Motor Learning. *Trends in*  
970 *Neurosciences*, 39(2), 114–123. <http://doi.org/10.1016/j.tins.2015.12.006>
- 971 Otchy, T. M., Wolff, S. B. E., Rhee, J. Y., Pehlevan, C., Kawai, R., Kempf, A., ... Ölveczky, B. P.  
972 (2015). Acute off-target effects of neural circuit manipulations. *Nature*, 528(7582), 358–  
973 363. <http://doi.org/10.1038/nature16442>
- 974 Penhune, V. B., & Doyon, J. (2002). Dynamic cortical and subcortical networks in learning and  
975 delayed recall of timed motor sequences. *Journal of Neuroscience*, 22(4), 1397–406.  
976 <http://doi.org/22/4/1397> [pii]

- 977 Penhune, V. B., & Steele, C. J. (2012). Parallel contributions of cerebellar, striatal and M1  
978 mechanisms to motor sequence learning. *Behavioural Brain Research*, 226(2), 579–591.  
979 <http://doi.org/10.1016/j.bbr.2011.09.044>
- 980 Peters, A. J., Lee, J., Hedrick, N. G., Neil, K. O., & Komiyama, T. (2017). Reorganization of  
981 corticospinal output during motor learning. *Nature Publishing Group*, (July).  
982 <http://doi.org/10.1038/nn.4596>
- 983 Picard, N., Matsuzaka, Y., & Strick, P. L. (2013). Extended practice of a motor skill is associated  
984 with reduced metabolic activity in M1. *Nature Neuroscience*, 16(9), 1340–7.  
985 <http://doi.org/10.1038/nn.3477>
- 986 Pinsard, B., Boutin, A., Gabitov, E., Lungu, O., Benali, H., & Doyon, J. (2018). Consolidation  
987 alters motor sequence-specific distributed representations. *bioRxiv*, 376053.  
988 <http://doi.org/10.1101/376053>
- 989 Poldrack, R. A. (2000). Imaging brain plasticity: Conceptual and methodological issues - A  
990 theoretical review. *NeuroImage*, 12(1), 1–13. <http://doi.org/10.1006/nimg.2000.0596>
- 991 Poldrack, R. A., Sabb, F. W., Foerde, K., Tom, S. M., Asarnow, R. F., Bookheimer, S. Y., &  
992 Knowlton, B. J. (2005). The neural correlates of motor skill automaticity. *Journal of*  
993 *Neuroscience*, 25(22), 5356–5364. <http://doi.org/10.1523/JNEUROSCI.3880-04.2005>
- 994 Raichle, M. E., MacLeod, A. M., Snyder, A. Z., Powers, W. J., Gusnard, D. A., & Shulman, G. L.  
995 (2001). A default mode of brain function. *Proceedings of the National Academy of Sciences*  
996 *of the United States of America*, 98(2), 676–682. <http://doi.org/10.1073/pnas.98.2.676>
- 997 Reis, J., Schambra, H. M., Cohen, L. G., Buch, E. R., Fritsch, B., Zarahn, E., ... Krakauer, J. W.  
998 (2009). Noninvasive cortical stimulation enhances motor skill acquisition over multiple days  
999 through an effect on consolidation. *Proceedings of the National Academy of Sciences of*  
1000 *the United States of America*, 106(5), 1590–1595. <http://doi.org/10.1073/pnas.0805413106>
- 1001 Reithler, J., van Mier, H. I., & Goebel, R. (2010). Continuous motor sequence learning: Cortical  
1002 efficiency gains accompanied by striatal functional reorganization. *NeuroImage*, 52(1),  
1003 263–276. <http://doi.org/10.1016/j.neuroimage.2010.03.073>
- 1004 Russo, A. A., Bittner, S. R., Perkins, S. M., Seely, J. S., London, B. M., Lara, A. H., ... & Abbott,  
1005 L. F. (2018). Motor cortex embeds muscle-like commands in an untangled population  
1006 response. *Neuron*, 97(4), 953-966.
- 1007 Russo, A. A., Khajeh, R., Bittner, S. R., Perkins, S. M., Cunningham, J. P., Abbott, L. F., &  
1008 Churchland, M. M. (2019). Neural trajectories in the supplementary motor area and primary  
1009 motor cortex exhibit distinct geometries, compatible with different classes of  
1010 computation. *bioRxiv*, 650002.
- 1011 Seidler, R. D., Purushotham, A., Kim, S. G., Ugurbil, K., Willingham, D., & Ashe, J. (2005).  
1012 Neural correlates of encoding and expression in implicit sequence learning. *Experimental*  
1013 *Brain Research*, 165(1), 114–124. <http://doi.org/10.1007/s00221-005-2284-z>
- 1014 Seidler, R. D., Purushotham, A., Kim, S. G., Ugurbil, K., Willingham, D., & Ashe, J. (2002).  
1015 Cerebellum activation associated with performance change but not motor learning.  
1016 *Science*, 296(5575), 2043–2046. <http://doi.org/10.1126/science.1068524>
- 1017 Shamloo, F., & Helie, S. (2016). Changes in default mode network as automaticity develops in a  
1018 categorization task. *Behavioural Brain Research*, 313, 324–333.  
1019 <http://doi.org/10.1016/j.bbr.2016.07.029>
- 1020 Shulman, G. L., Fiez, J. A., Corbetta, M., Buckner, R. L., Miezin, F. M., Raichle, M. E., &  
1021 Petersen, S. E. (1997). Common blood flow changes across visual tasks: II. Decreases in  
1022 cerebral cortex. *Journal of Cognitive Neuroscience*, 9(5), 648–663.  
1023 <http://doi.org/10.1162/jocn.1997.9.5.648>
- 1024 Steele, C. J., & Penhune, V. B. (2010). Specific Increases within Global Decreases : A  
1025 Functional Magnetic Resonance Imaging Investigation of Five Days of Motor Sequence  
1026 Learning, 30(24), 8332–8341. <http://doi.org/10.1523/JNEUROSCI.5569-09.2010>
- 1027 Tamás Kincses, Z., Johansen-Berg, H., Tomassini, V., Bosnell, R., Matthews, P. M., &

- 1028 Beckmann, C. F. (2008). Model-free characterization of brain functional networks for motor  
1029 sequence learning using fMRI. *NeuroImage*, 39(4), 1950–1958.  
1030 <http://doi.org/10.1016/j.neuroimage.2007.09.070>
- 1031 Toni, I., Krams, M., Turner, R., & Passingham, R. E. (1998). The time course of changes during  
1032 motor sequence learning: A whole- brain fMRI study. *NeuroImage*, 8(1), 50–61.  
1033 <http://doi.org/10.1006/nimg.1998.0349>
- 1034 Ungerleider, L. G., Doyon, J., & Karni, A. (2002). Imaging brain plasticity during motor skill  
1035 learning. *Neurobiology of Learning and Memory*, 78(3), 553–564.  
1036 <http://doi.org/10.1006/nlme.2002.4091>
- 1037 Vahdat, S., Lungu, O., Cohen-Adad, J., Marchand-Pauvert, V., Benali, H., & Doyon, J. (2015).  
1038 Simultaneous Brain-Cervical Cord fMRI Reveals Intrinsic Spinal Cord Plasticity during  
1039 Motor Sequence Learning. *PLoS Biology*, 13(6), e1002186.  
1040 <http://doi.org/10.1371/journal.pbio.1002186>
- 1041 Walther, A., Nili, H., Ejaz, N., Alink, A., Kriegeskorte, N., & Diedrichsen, J. (2016). Reliability of  
1042 dissimilarity measures for multi-voxel pattern analysis. *NeuroImage*, 137, 188–200.  
1043 <http://doi.org/10.1016/j.neuroimage.2015.12.012>
- 1044 Waters-metenier, S., Husain, M., & Wiestler, T. (2014). Bihemispheric Transcranial Direct  
1045 Current Stimulation Enhances Effector-Independent Representations of Motor Synergy and  
1046 Sequence Learning, 34(3), 1037–1050. <http://doi.org/10.1523/JNEUROSCI.2282-13.2014>
- 1047 Wiestler, T., & Diedrichsen, J. (2013). Skill learning strengthens cortical representations of  
1048 motor sequences. *eLife*, 2013(2), 1–20. <http://doi.org/10.7554/eLife.00801>
- 1049 Wu, T., Kansaku, K., & Hallett, M. (2004). How Self-Initiated Memorized Movements Become  
1050 Automatic: A Functional MRI Study. *Journal of Neurophysiology*, 91(4), 1690–1698.  
1051 <http://doi.org/10.1152/jn.01052.2003>
- 1052 Wymbs, N. F., & Grafton, S. T. (2015). The human motor system supports sequence-specific  
1053 representations over multiple training-dependent timescales. *Cerebral Cortex*, 25(11),  
1054 4213–4225. <http://doi.org/10.1093/cercor/bhu144>
- 1055 Xiong, J., Ma, L., Wang, B., Narayana, S., Duff, E. P., Egan, G. F., & Fox, P. T. (2009). Long-  
1056 term motor training induced changes in regional cerebral blood flow in both task and  
1057 resting states. *NeuroImage*, 45(1), 75–82. <http://doi.org/10.1016/j.neuroimage.2008.11.016>
- 1058 Yin, H. H., Mulcare, S. P., Hilário, M. R. F., Clouse, E., Holloway, T., Davis, M. I., ... Costa, R.  
1059 M. (2009). Dynamic reorganization of striatal circuits during the acquisition and  
1060 consolidation of a skill. *Nature Neuroscience*, 12(3), 333–341.  
1061 <http://doi.org/10.1038/nn.2261>
- 1062 Yokoi, A., Arbuckle, S. A., & Diedrichsen, J. (2018). The role of human primary motor cortex in  
1063 the production of skilled finger sequences. *Journal of Neuroscience*, 38(6), 1430–1442.  
1064 <http://doi.org/10.1523/JNEUROSCI.2798-17.2017>
- 1065 Yokoi, A., & Diedrichsen, J. (2019). Neural Organization of Hierarchical Motor Sequence  
1066 Representations in the Human Neocortex. *Neuron*, 103(6), 1178–1190.e7.  
1067 <http://doi.org/10.1016/j.neuron.2019.06.017>
- 1068 Yousry, T. A., Schmid, U. D., Alkadhi, H., Schmidt, D., Peraud, A., Buettner, A., & Winkler, P.  
1069 (1997). Localization of the motor hand area to a knob on the precentral gyrus. A new  
1070 landmark. *Brain*, 120(1), 141–157. <http://doi.org/10.1093/brain/120.1.141>
- 1071  
1072
